# Supplementary material for: 1H-1,2,3-triazolyl-1,6-naphthyridin-7(6H)-ones as Potential Fluorescent Nucleoside Analogues: Synthesis and Optical Properties
Source: MDPI journal article supplement (doi:10.3390/molecules29030687), 2024-02-01

## Supporting information

### **1H-1,2,3-triazolyl-1,6-naphthyridin-7(6*H*)-ones as potential fluorescent nucleoside analogues : Synthesis and optical properties**

Anissa Beghennou, Océane Rondot, Vincent Corcé and Candice Botuha

# **I. Table S1. CuAAC reaction attempts to get Compound 4**

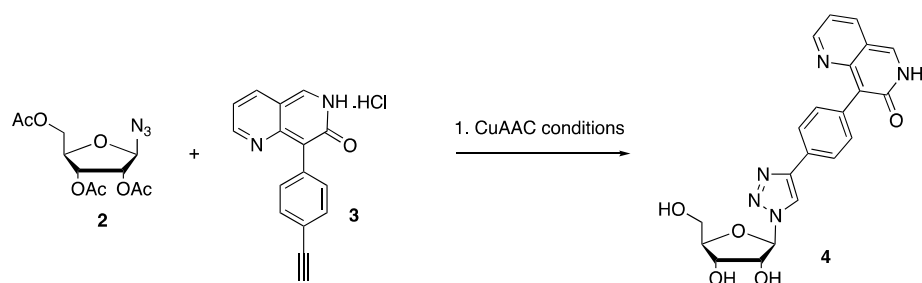

a. Tris(benzyltriazolylmethyl)amine. b. Diisopropylethylamine. c. Solubility issues

| Conditions                                                                                | Solvent                                 | Temp           | Time   | Product/outcome          |
|-------------------------------------------------------------------------------------------|-----------------------------------------|----------------|--------|--------------------------|
| 5% mol. CuSO <sub>4</sub> ·5H <sub>2</sub> O, 10% mol. NaAsc                              | <i>t</i> -BuOH/<br>Phosphate<br>buffer  | 20 °C          | 24h    | No reaction              |
| 10% mol. CuSO <sub>4</sub> ·5H <sub>2</sub> O, 30% mol. NaAsc, 10% mol. TBTA <sup>a</sup> | <i>t</i> -BuOH/<br>H <sub>2</sub> O     | 75 °C          | 24h    | No reaction              |
| 10% mol. CuSO <sub>4</sub> ·5H <sub>2</sub> O, 30% mol. NaAsc                             | DMF                                     | 150 °C<br>(MW) | 30min. | Degradation              |
| 10% mol. CuSO <sub>4</sub> ·5H <sub>2</sub> O, 30% mol. NaAsc, 1 equiv. DIPEA             | CH <sub>3</sub> CN                      | 60 °C          | 24h    | No reaction              |
| 2 equiv.. CuSO <sub>4</sub> ·5H <sub>2</sub> O, 4 equiv. NaAsc, 1 equiv. DIPEA            | CH <sub>3</sub> CN/<br>H <sub>2</sub> O | 20 °C          | 24h    | No reaction <sup>c</sup> |
| 10% mol. CuI, 1 equiv. DIPEA                                                              | CH <sub>3</sub> CN                      | 20 °C          | 24h    | No reaction              |
| 10% mol. Cu(IMes)Cl, 1 equiv. DIPEA                                                       | CH <sub>3</sub> CN                      | 20 °C          | 24h    | No reaction              |
| 10% mol. Cu(IMes)Cl, 1 equiv. DIPEA                                                       | MeOH                                    | 20 °C          | 24h    | No reaction              |
| 2 equiv. CuI, 1 equiv. DIPEA                                                              | THF                                     | 60 °C          | 24h    | No reaction <sup>c</sup> |

## II. Absorption spectra in various solvent of TzNat A-C

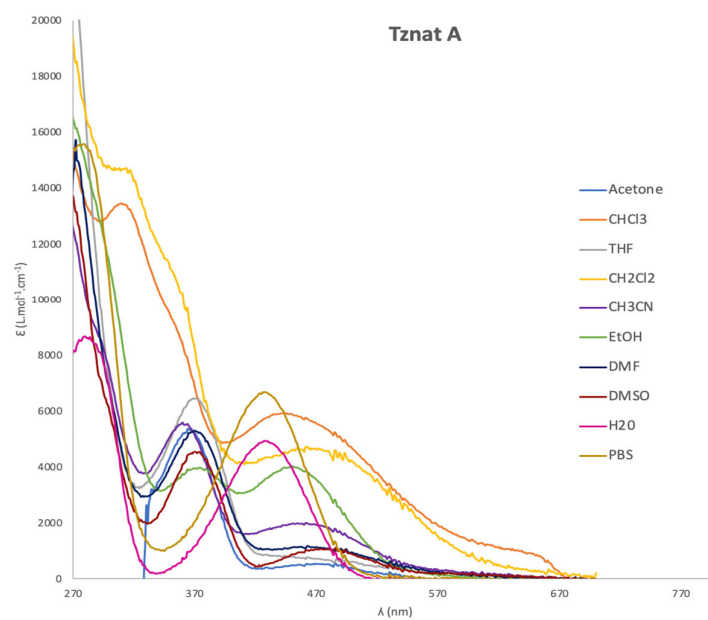

Figure S1

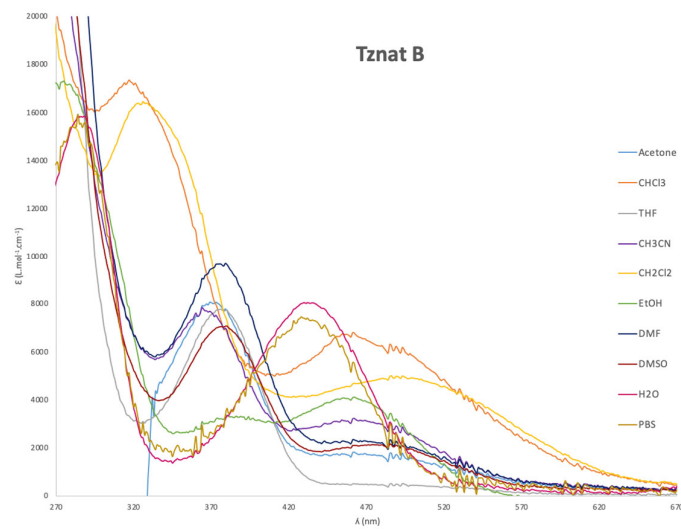

Figure S2

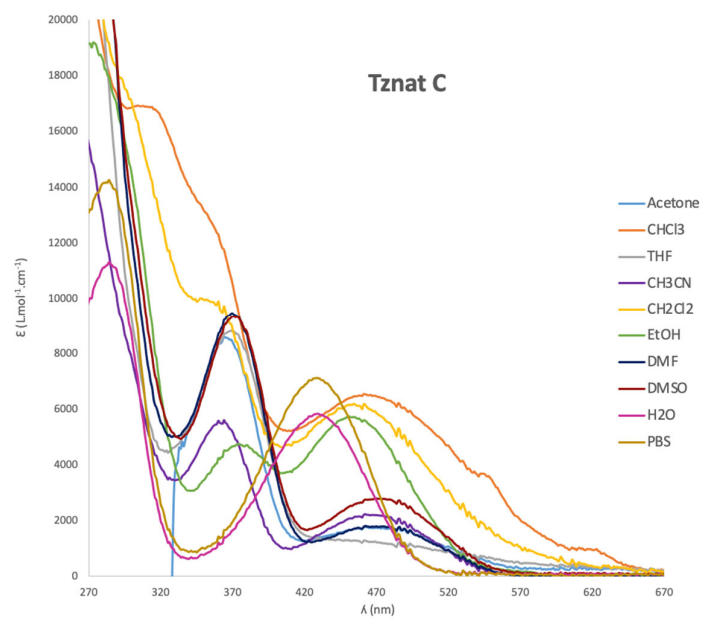

**Figure S3**

### III. $^1\text{H}$ and $^{13}\text{C}$ NMR spectra

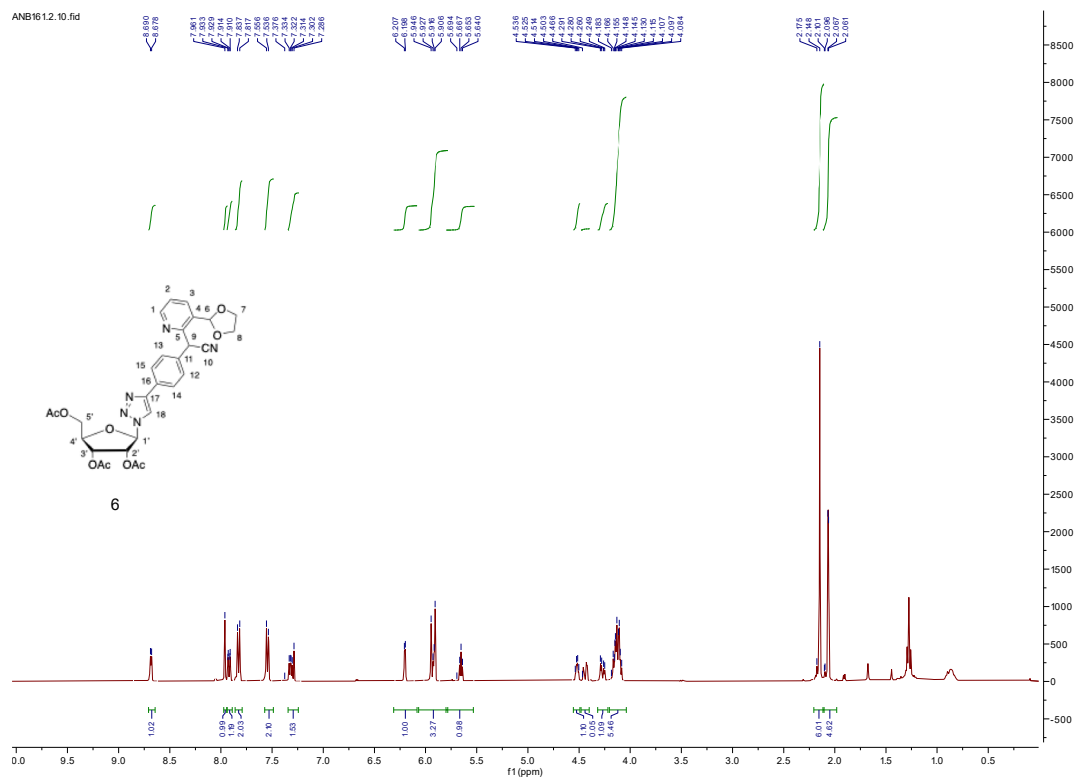

bc194p.10.fid

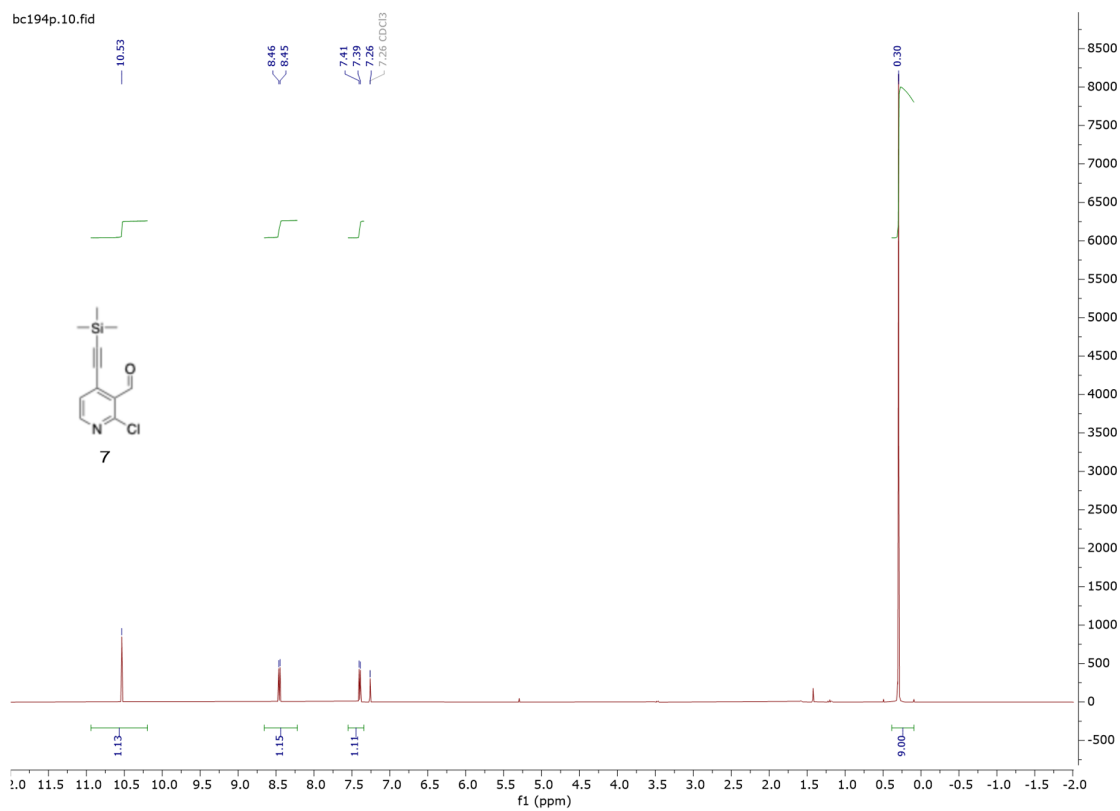

ANB-BC192.11.fid

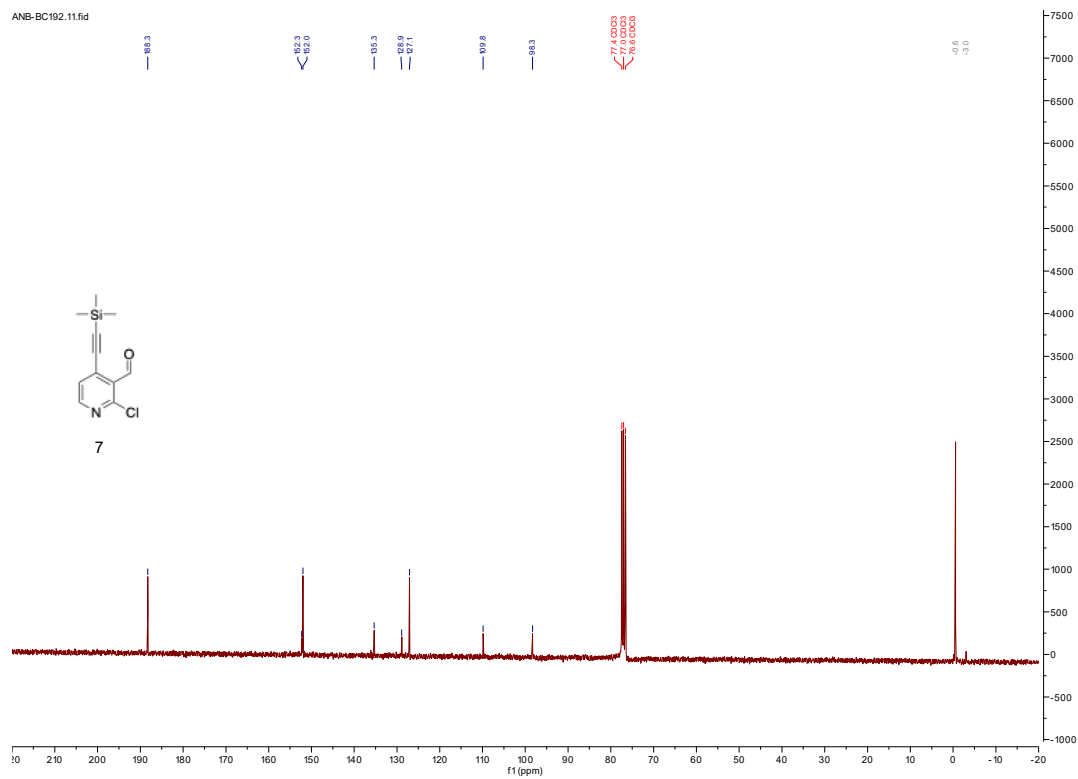

bc195 pur.10.fid

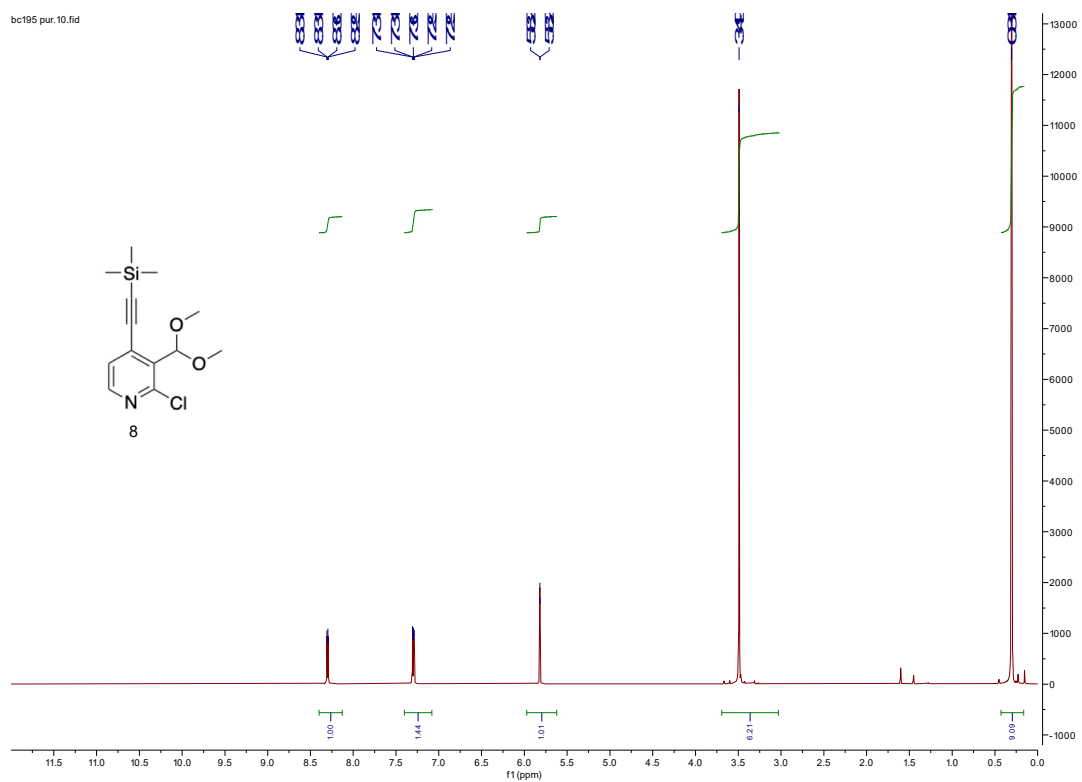

bc195p.21.fid

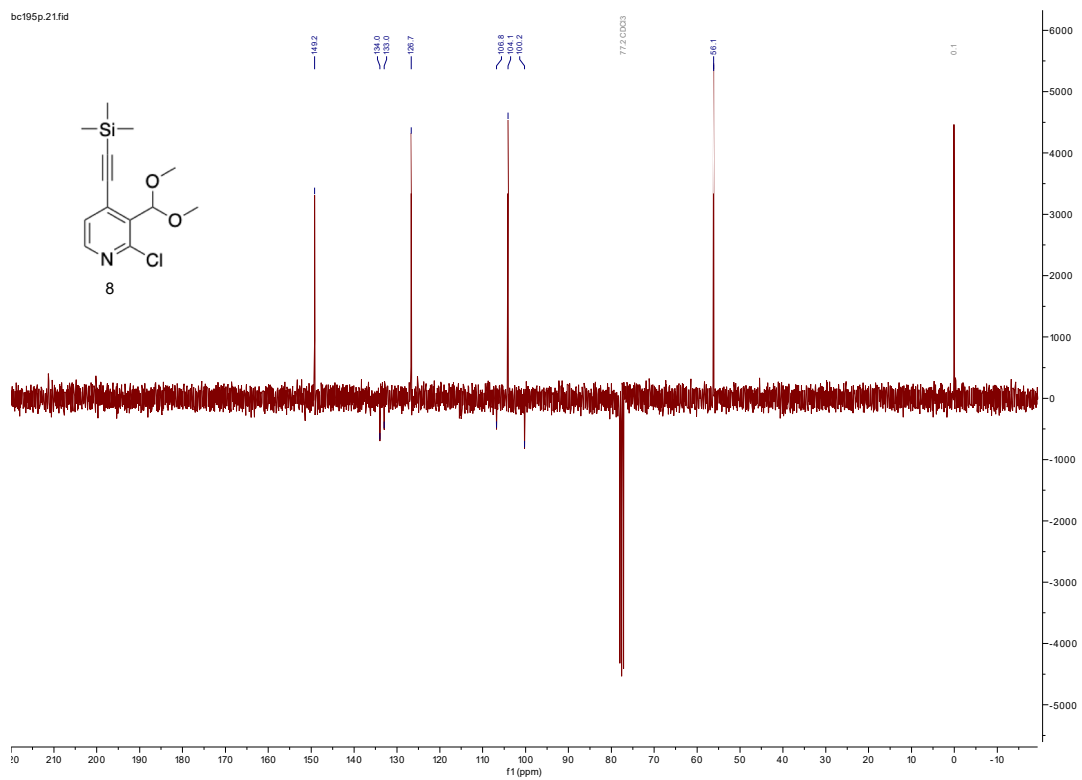

bc195p.10.fid

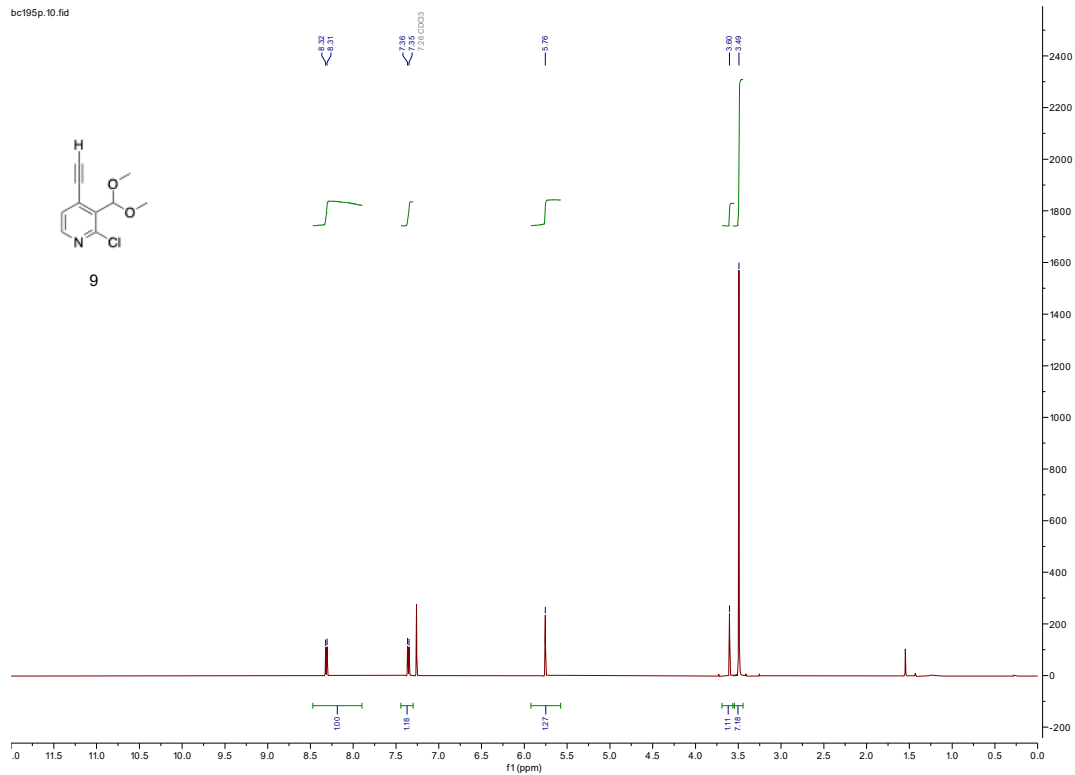

ANB-BC196.11.fid

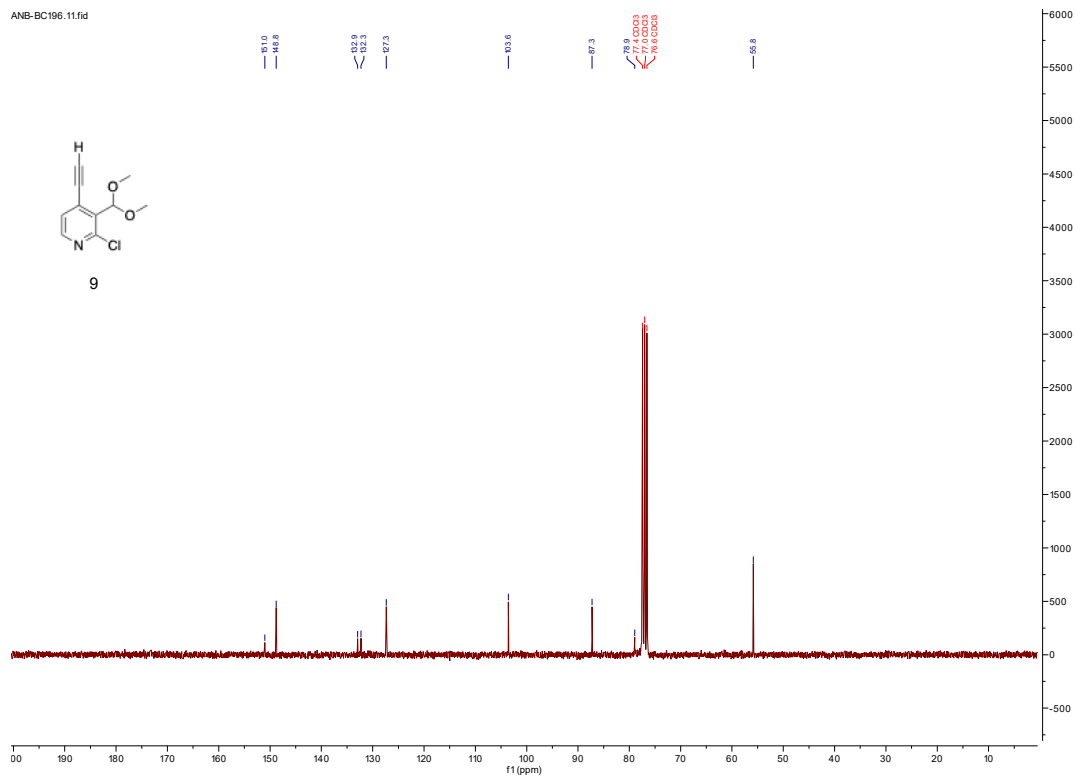



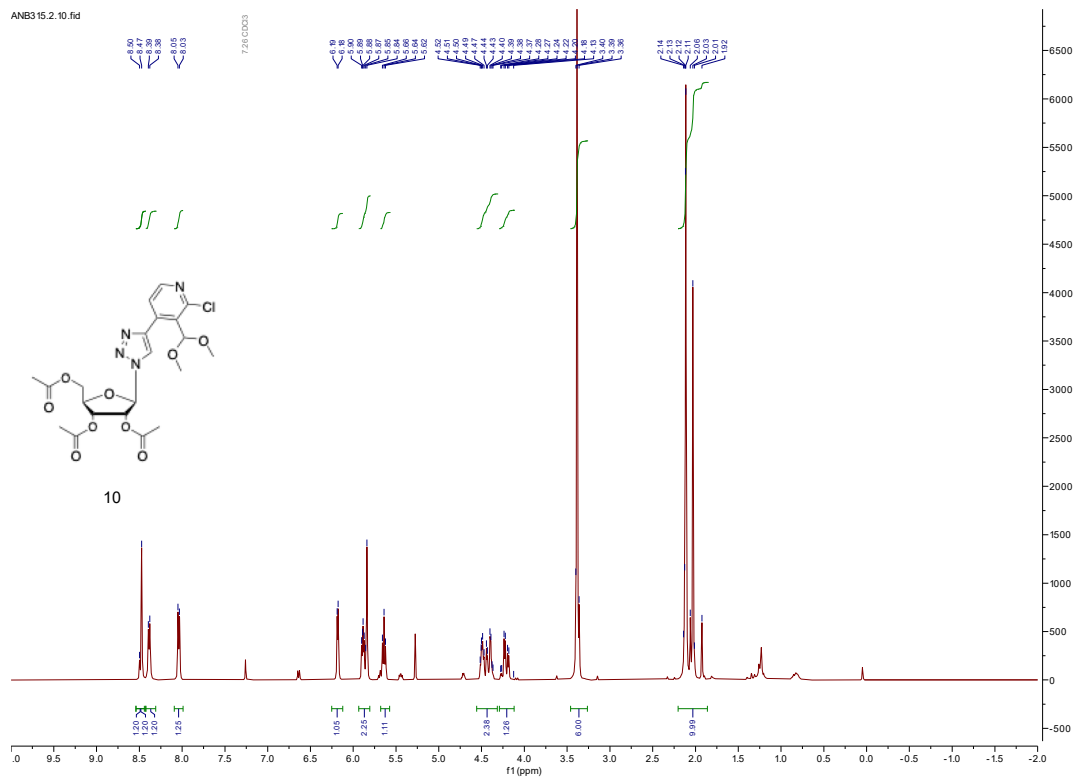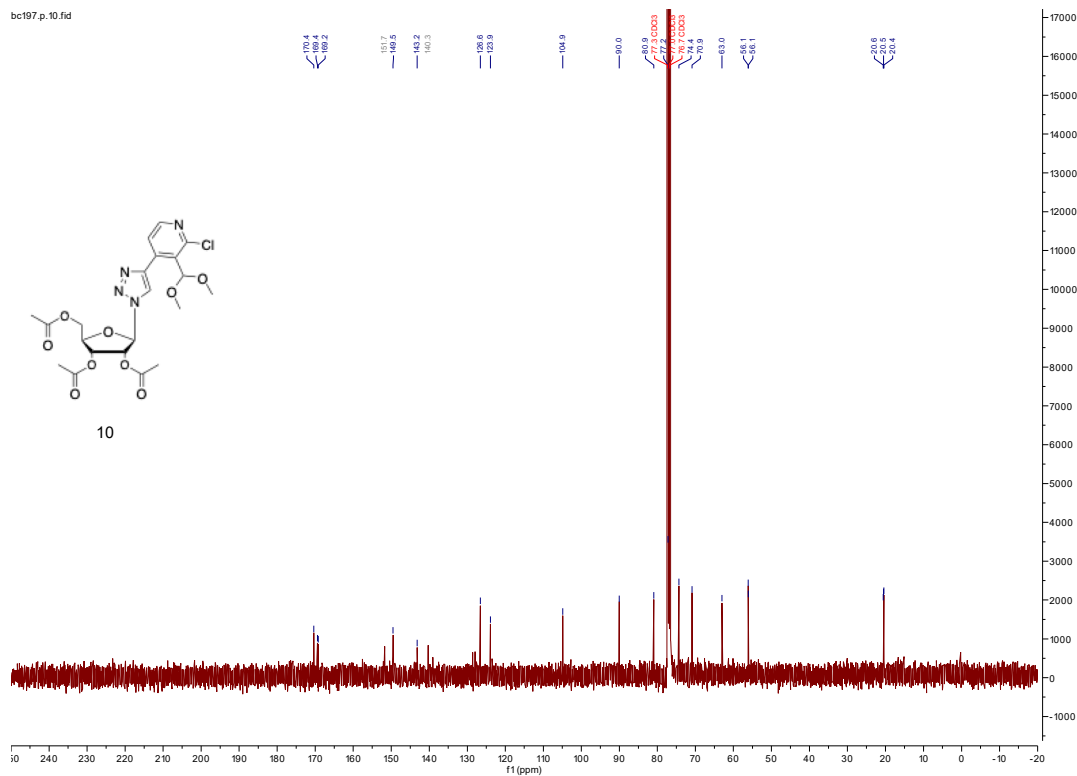

ANB333.2.10.fid

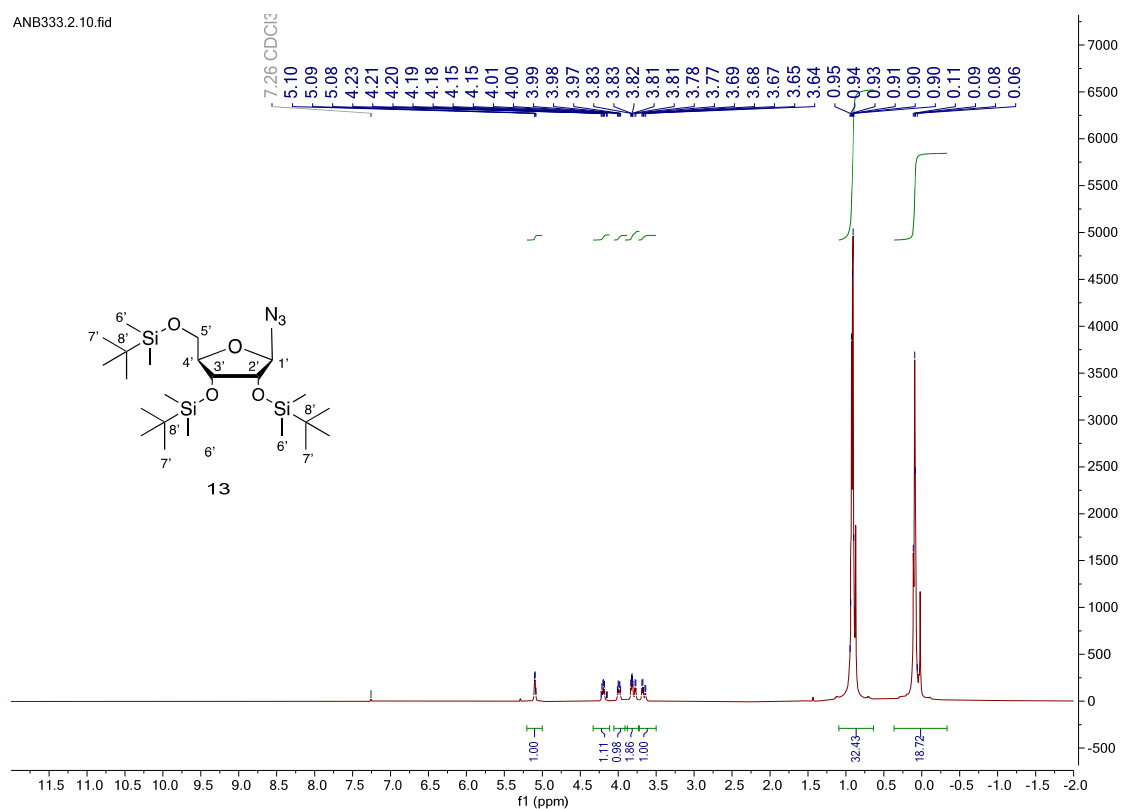

ANB319.2.fin.12.fid

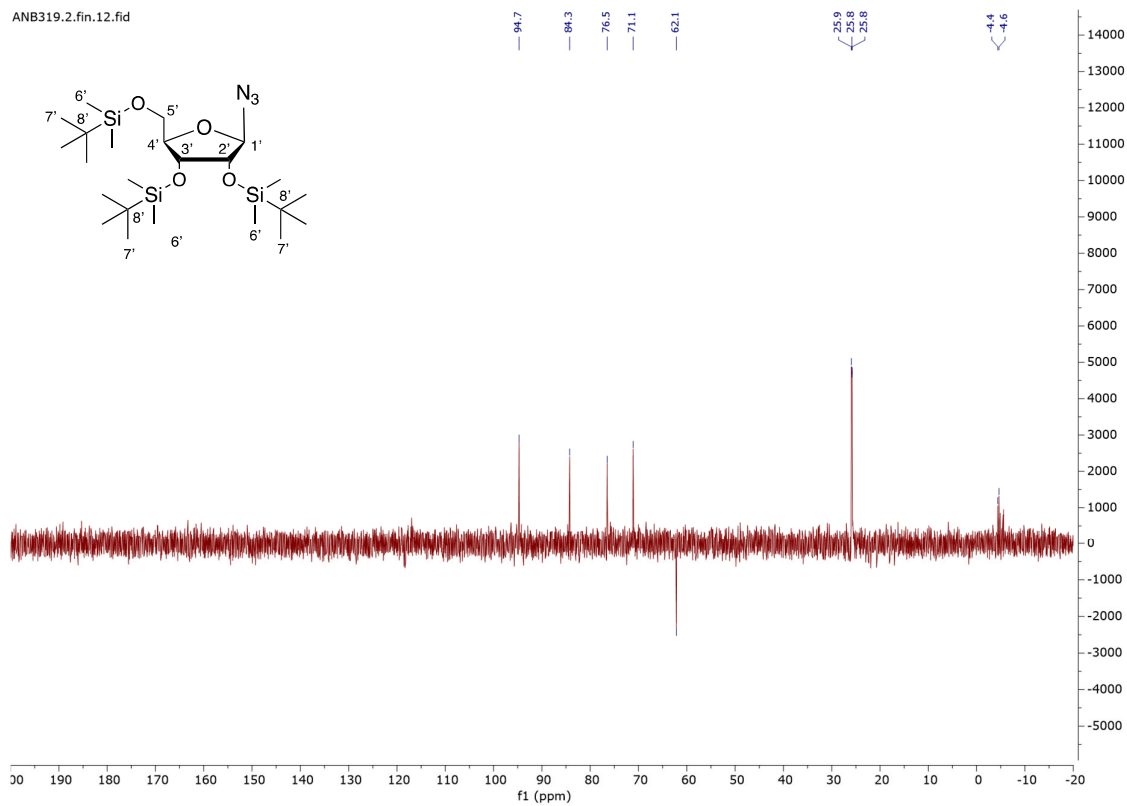



ANB322.2.f1n.12.fid

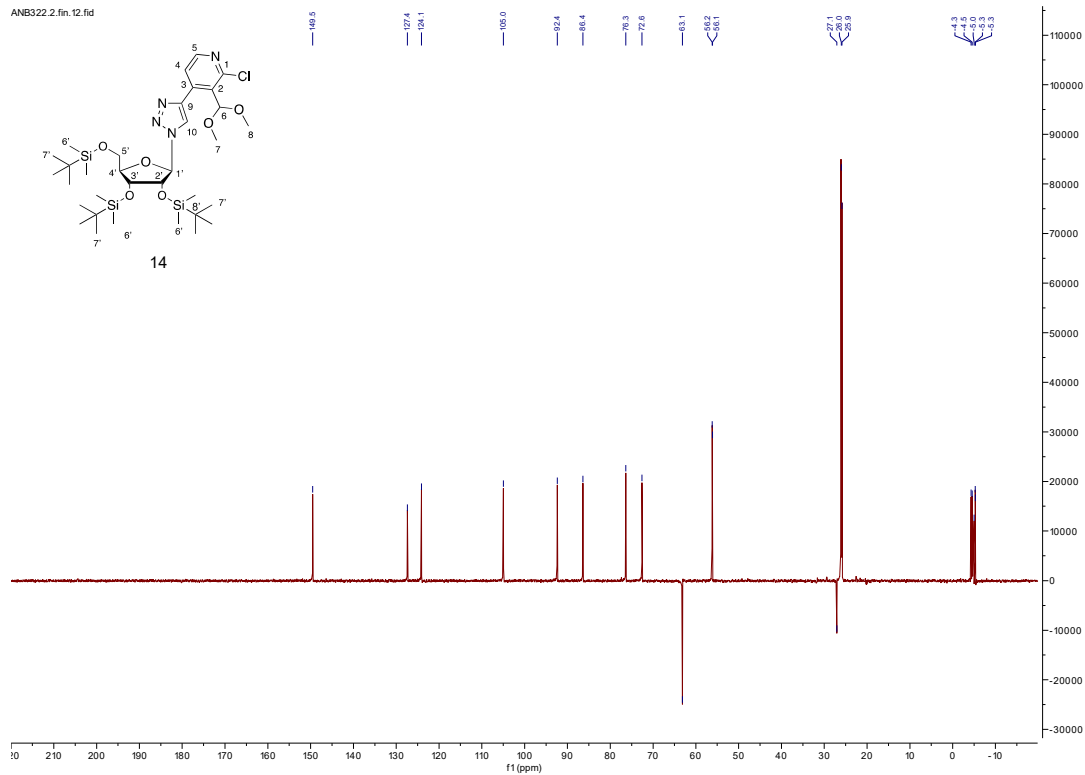

HSQC spectrum of molecule 14 at 400 MHz is shown below

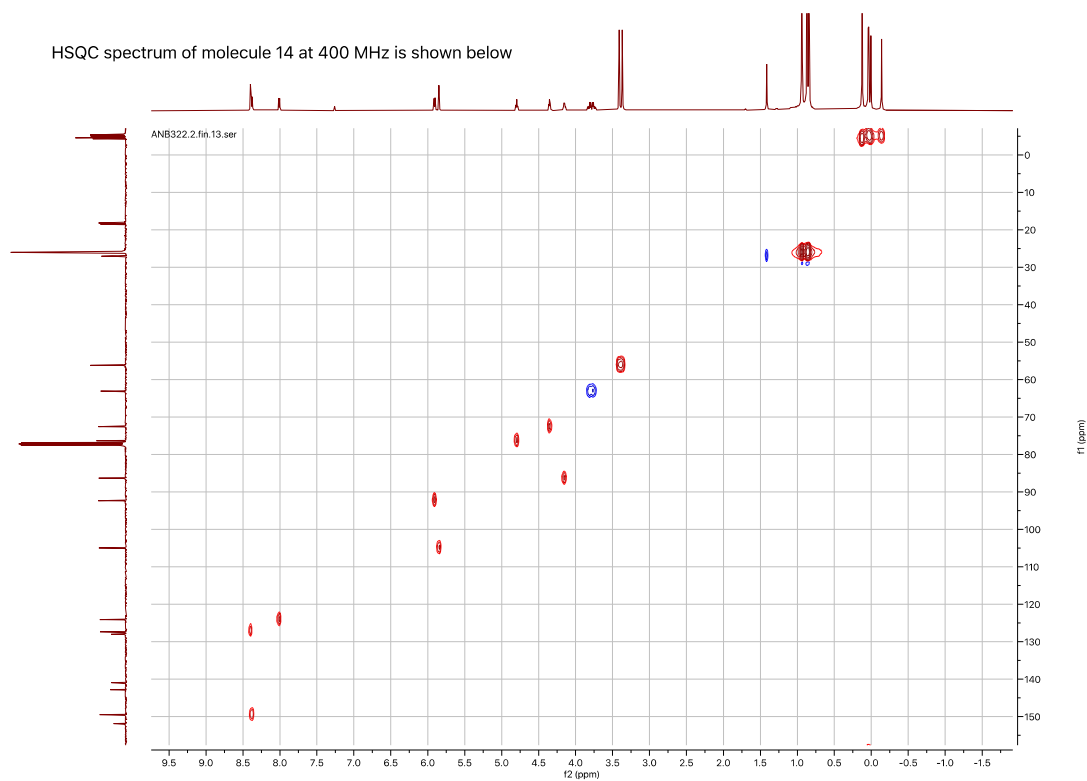

[illegible]

OR-176-Analyse3-CDCl3.10.fid

Chemical structure of compound 15 is shown. The structure is a complex molecule with a central benzene ring substituted with a nitrile group and a 1,2,4-triazole ring. The triazole ring is further substituted with a 1,3-bis(trimethylsilyloxy)propyl group. The peaks are labeled with their chemical shifts and integrations.

| Chemical Shift (ppm)                                                                                                                                                         | Integration                              |
|------------------------------------------------------------------------------------------------------------------------------------------------------------------------------|------------------------------------------|
| 8.62, 8.61, 8.61, 8.60                                                                                                                                                       | 0.97, 0.97                               |
| 8.09, 8.08                                                                                                                                                                   | 0.98, 0.93                               |
| 7.60, 7.59, 7.59, 7.58, 7.57, 7.57, 7.36, 7.35, 7.35, 7.35, 7.34, 7.34, 7.32, 7.32, 7.32, 7.31, 7.31, 7.29, 7.29, 7.28, 7.28, 7.26, 7.26, 7.23, 7.23, 7.22, 7.21, 7.20, 7.19 | 1.87, 2.13, 1.87, 2.31, 0.98, 1.27, 1.05 |
| 6.49, 6.48                                                                                                                                                                   | 1.00, 0.94                               |
| 6.08, 6.07, 6.06                                                                                                                                                             | 0.99, 0.95                               |
| 5.83, 5.83                                                                                                                                                                   | 0.96, 1.00                               |

Zoom area 3 – 5 ppm

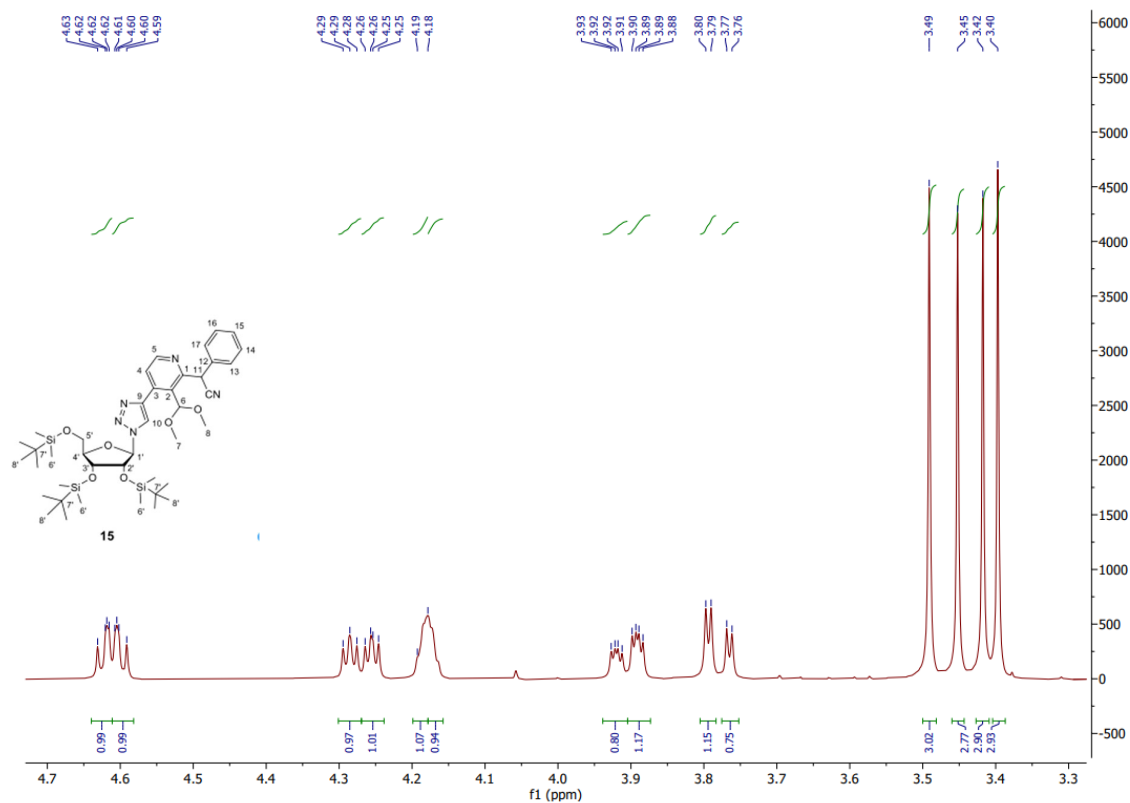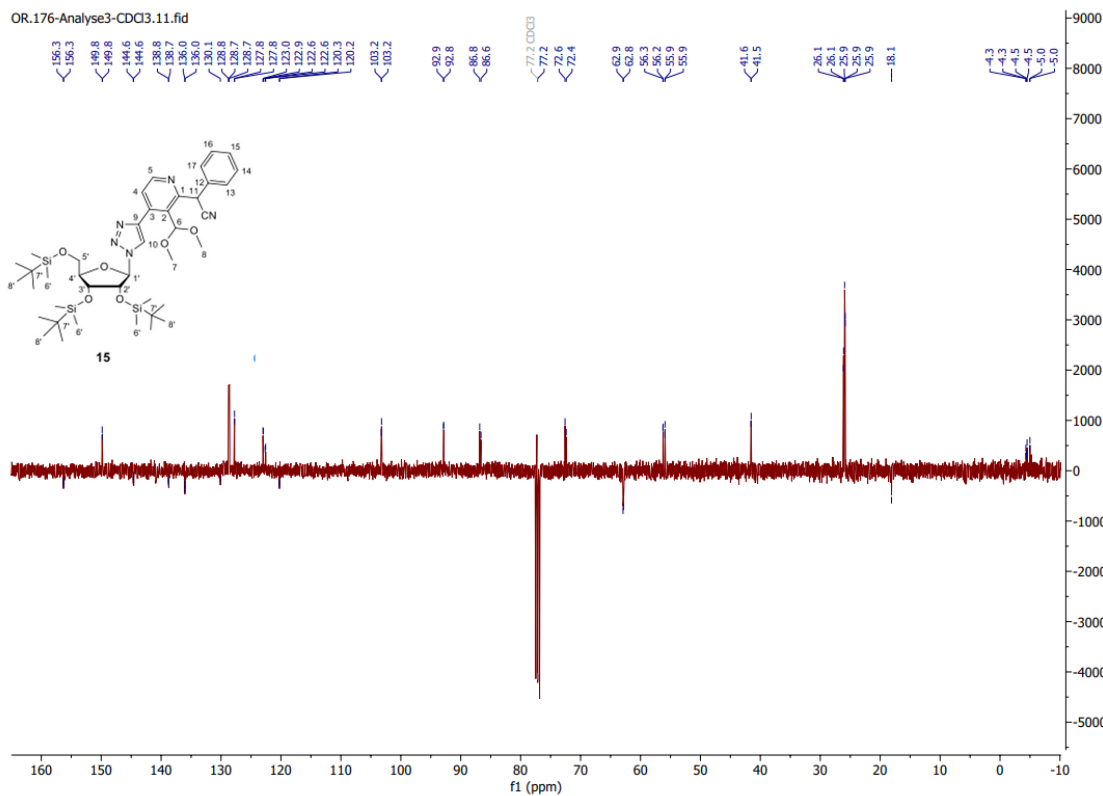

COSY spectrum of molecule **15** at 400 MHz

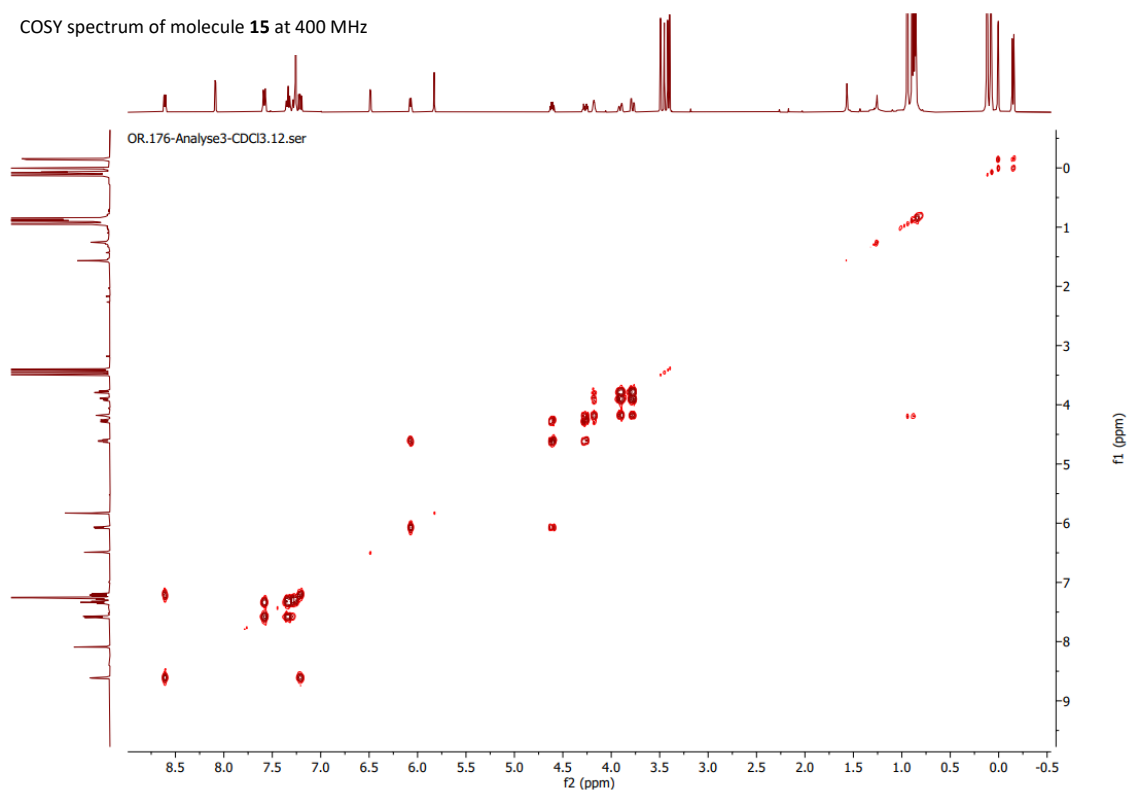

HSQC spectrum of molecule **15** at 400 MHz

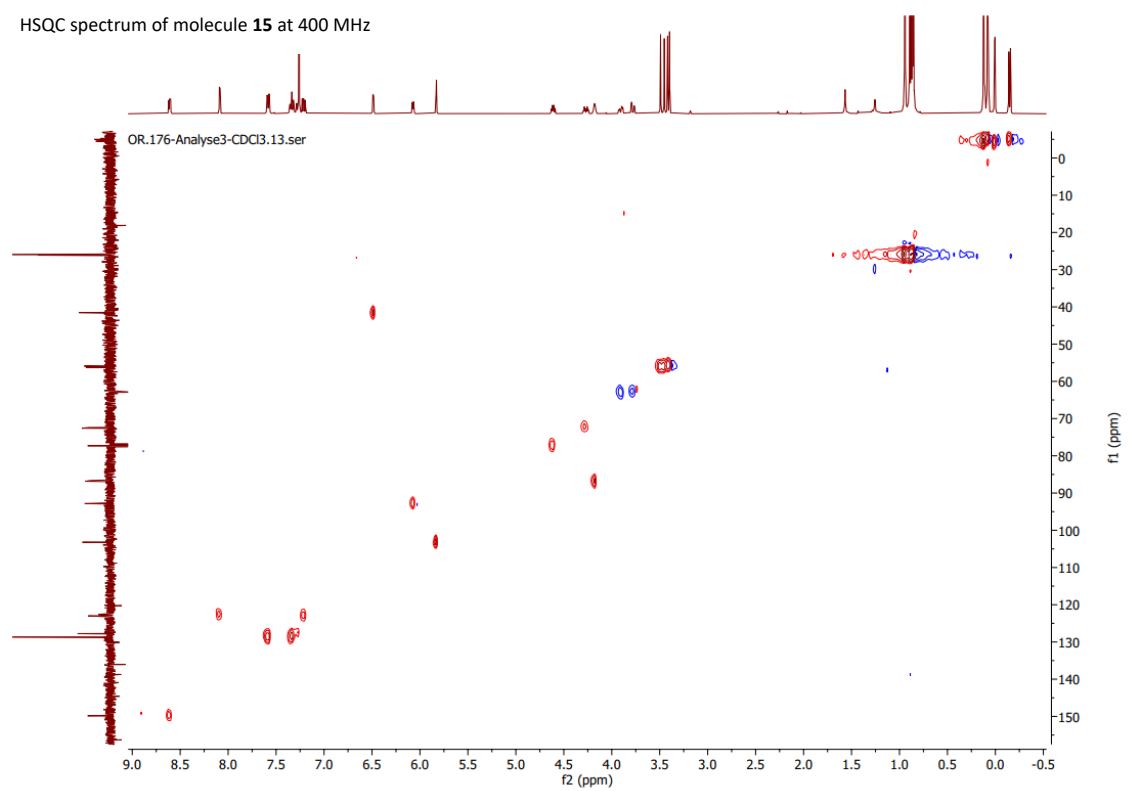

HMBC spectrum of molecule **15** at 400 MHz

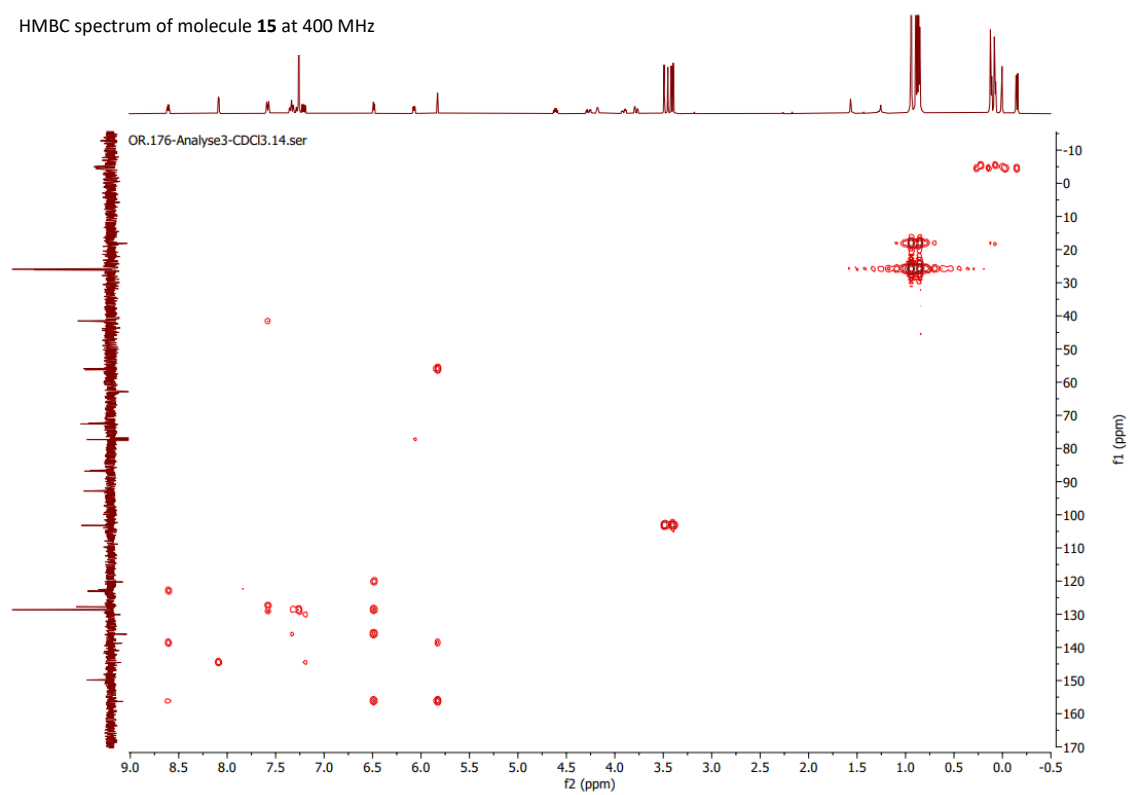



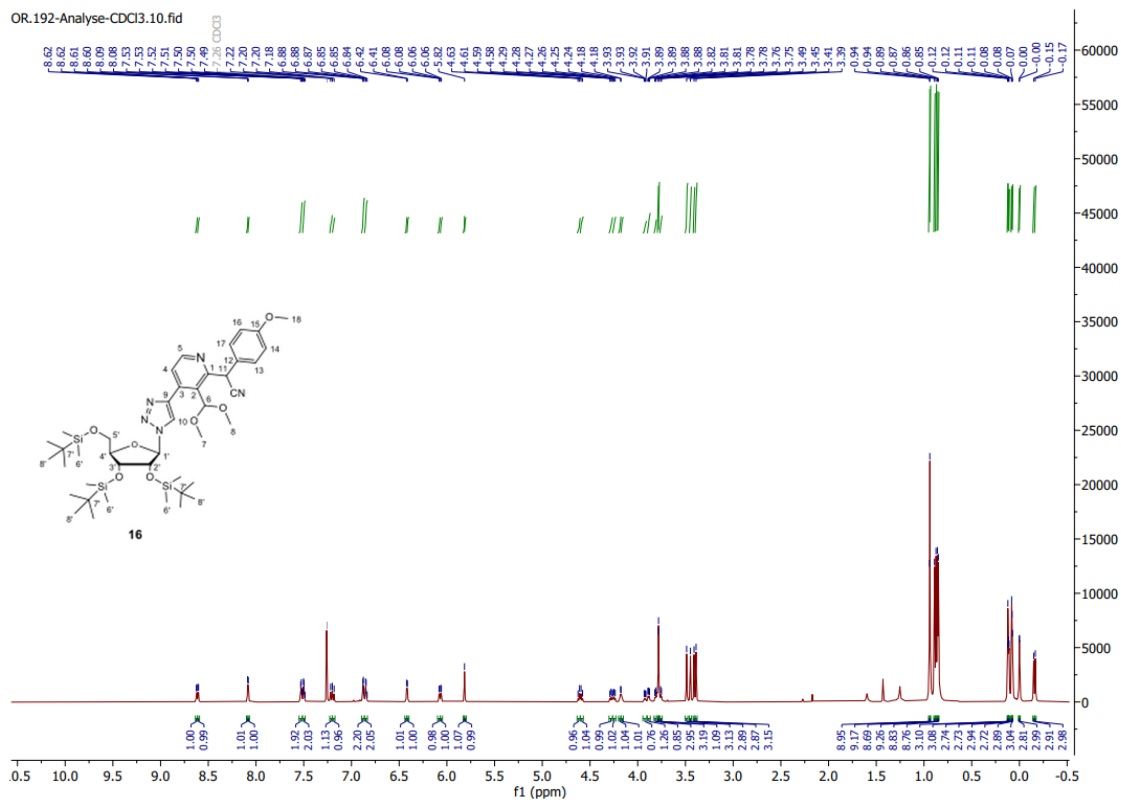

Zoom area 5 -9 ppm

OR.192-Analyse-CDCl3.10.fid

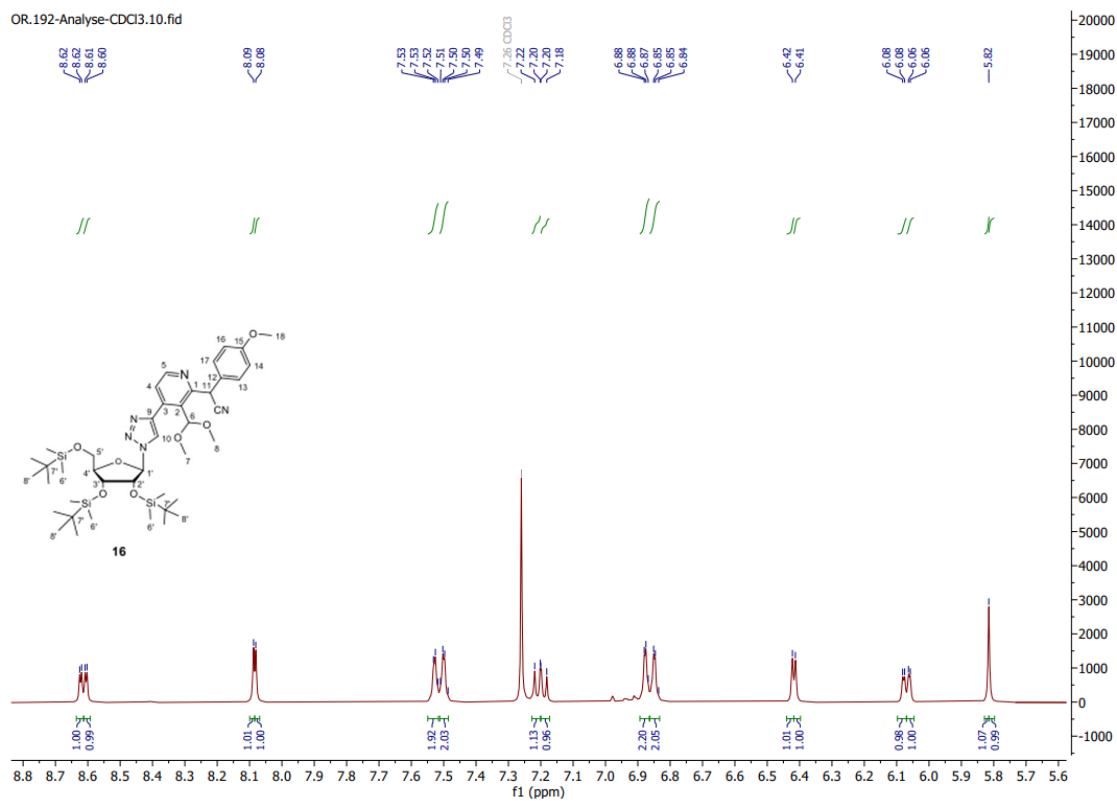

Zoom area 3 – 5 ppm

OR\_192-Analyse\_C003\_3.10.fid

Chemical structure of compound **16** is shown on the left. The structure is a complex molecule featuring a central pyridine ring substituted with a cyano group (CN), a methoxy group (OMe), and a 1,2,3-trisubstituted benzene ring. The pyridine ring is also substituted with a 1,2,3-trisubstituted benzene ring. The molecule is labeled **16**.

<sup>1</sup>H NMR spectrum (CDCl<sub>3</sub>) of compound **16**. The x-axis represents the chemical shift in ppm (f1), ranging from 3.3 to 4.7. The y-axis represents the intensity, ranging from -500 to 9000. The spectrum shows several peaks, with integration values provided below the baseline.

Integration values (from left to right): 0.96, 1.04, 0.99, 1.02, 1.04, 1.01, 0.76, 1.26, 0.85, 2.95, 3.19, 1.09, 3.13, 2.89, 2.87, 3.15.

Chemical shift values (ppm) are listed above the peaks: 4.29, 4.28, 4.27, 4.26, 4.25, 4.24, 4.18, 4.18, 3.93, 3.92, 3.91, 3.91, 3.89, 3.88, 3.88, 3.82, 3.81, 3.81, 3.78, 3.76, 3.75, 3.49, 3.45, 3.41, 3.39.

OR.192-Analyse-CDCI3.11.fid

Chemical structure of compound **16** is shown in the top left corner. The structure is a complex molecule with a central pyrazole ring, a nitrile group, and a phenyl ring. It is substituted with a 1,3-bis(trimethylsilyloxy)propyl group.

The <sup>13</sup>C NMR spectrum (CDCl<sub>3</sub>) shows the following chemical shifts (ppm):

| Chemical Shift (ppm) |
|----------------------|
| 159.2                |
| 159.1                |
| 158.5                |
| 156.5                |
| 149.8                |
| 146.8                |
| 144.7                |
| 144.6                |
| 138.7                |
| 138.7                |
| 130.0                |
| 129.9                |
| 129.9                |
| 128.1                |
| 128.1                |
| 127.5                |
| 127.5                |
| 122.9                |
| 122.6                |
| 122.5                |
| 120.5                |
| 120.5                |
| 114.0                |
| 103.2                |
| 103.2                |
| 92.9                 |
| 92.8                 |
| 86.8                 |
| 86.6                 |
| 77.4                 |
| 77.3                 |
| 77.2                 |
| 72.6                 |
| 72.4                 |
| 62.9                 |
| 62.8                 |
| 56.2                 |
| 55.9                 |
| 55.9                 |
| 55.4                 |
| 40.7                 |
| 40.7                 |
| 26.1                 |
| 26.1                 |
| 25.9                 |
| 25.8                 |
| 25.8                 |
| 18.2                 |
| 18.1                 |
| -4.3                 |
| -4.3                 |
| -4.5                 |
| -4.5                 |
| -4.5                 |
| -4.5                 |
| -5.0                 |
| -5.0                 |
| -5.2                 |
| -5.2                 |
| -5.3                 |
| -5.3                 |

COSY spectrum of molecule **16** at 400 MHz

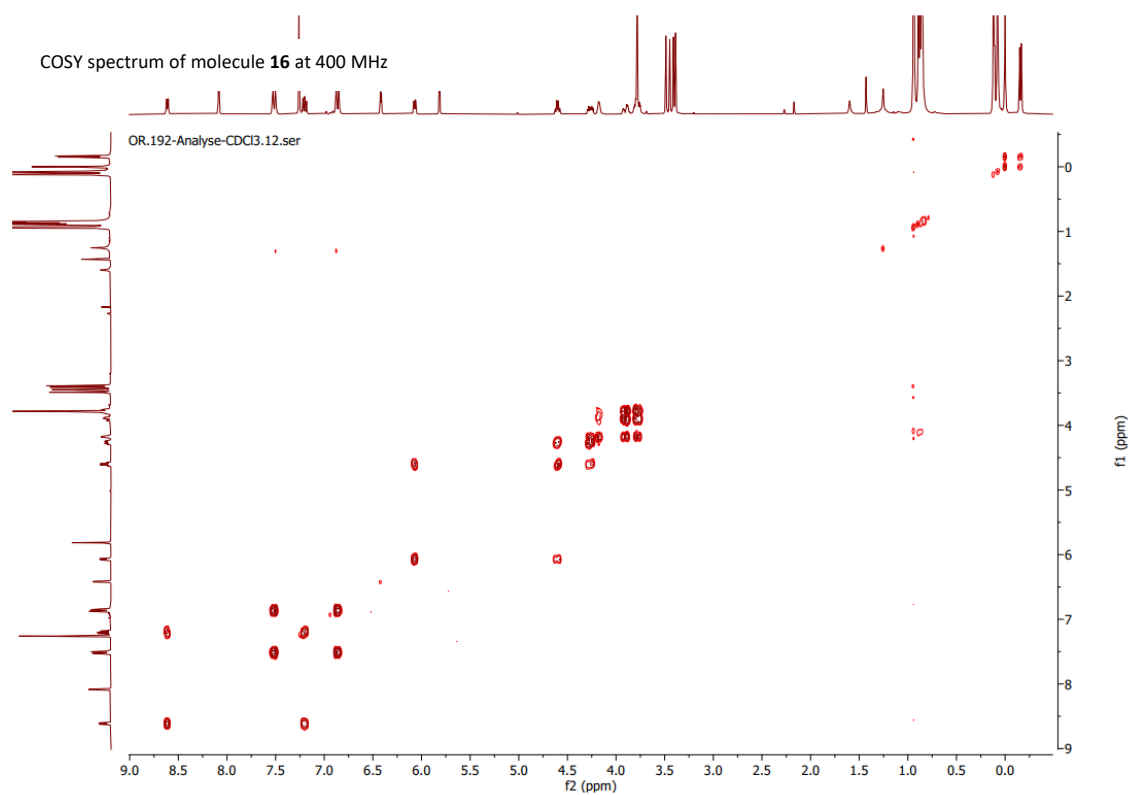

HSQC spectrum of molecule **16** at 400 MHz

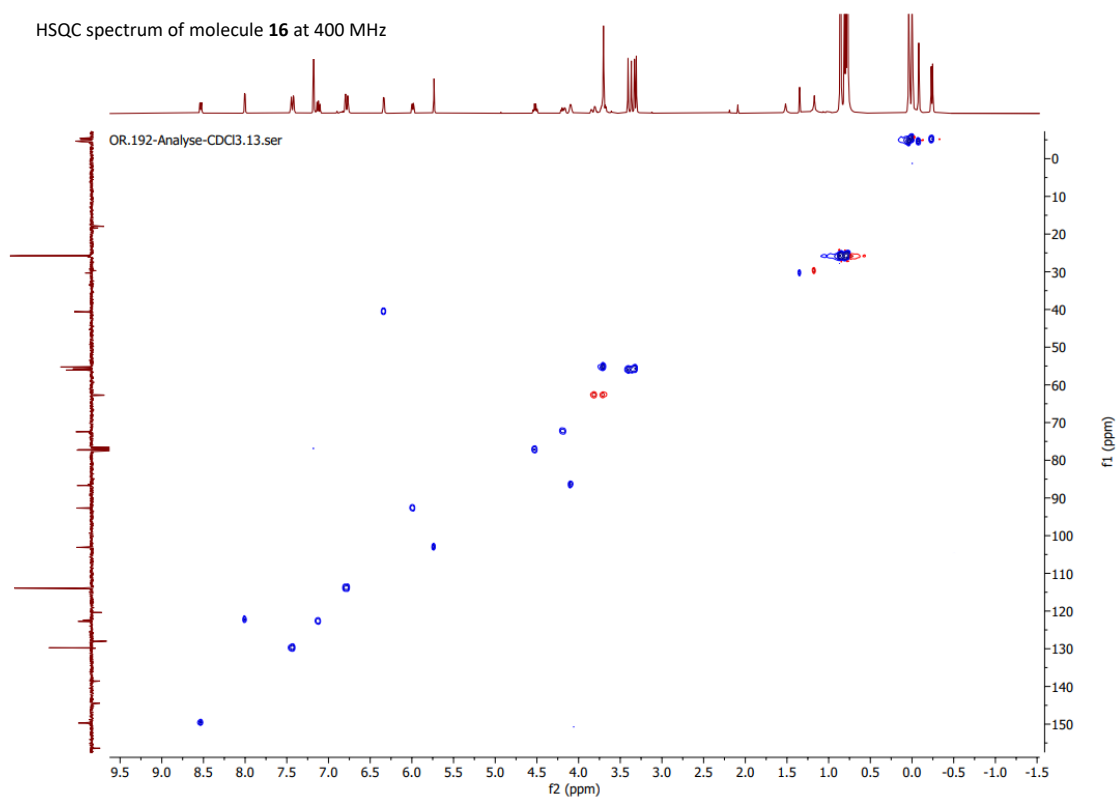

HMBC spectrum of molecule **16** at 400 MHz

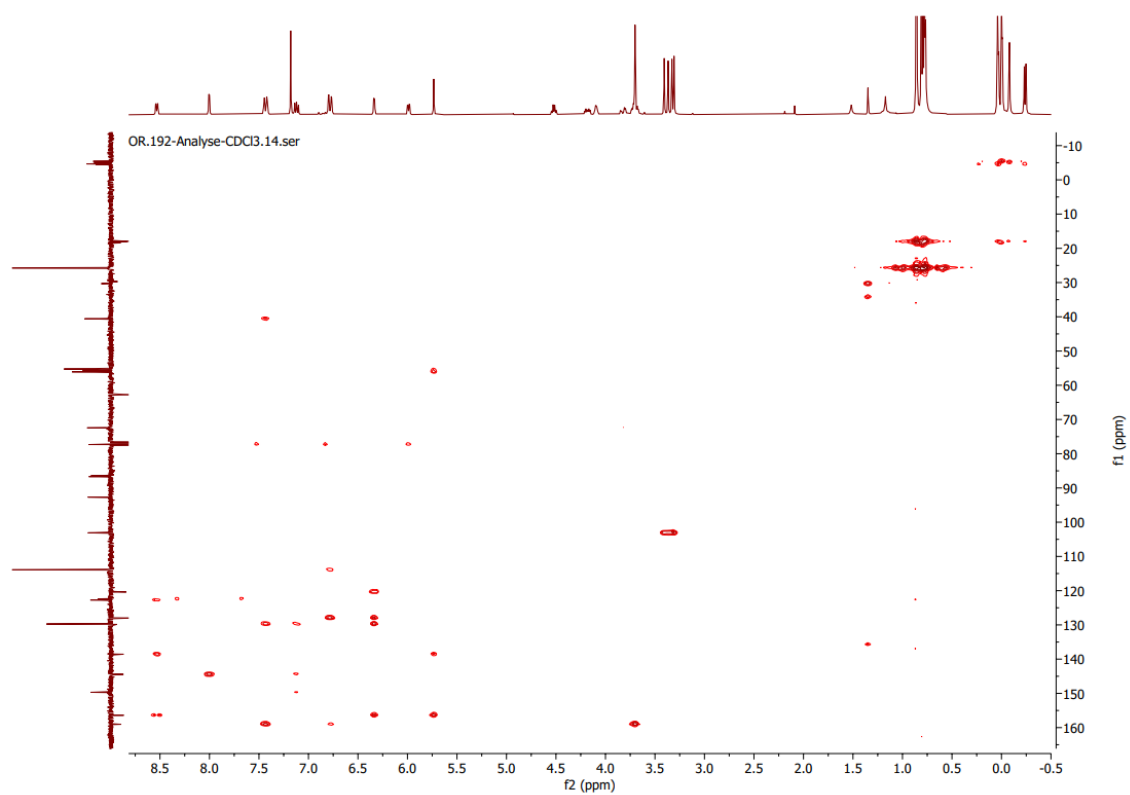



Zoom area 3 – 5 ppm

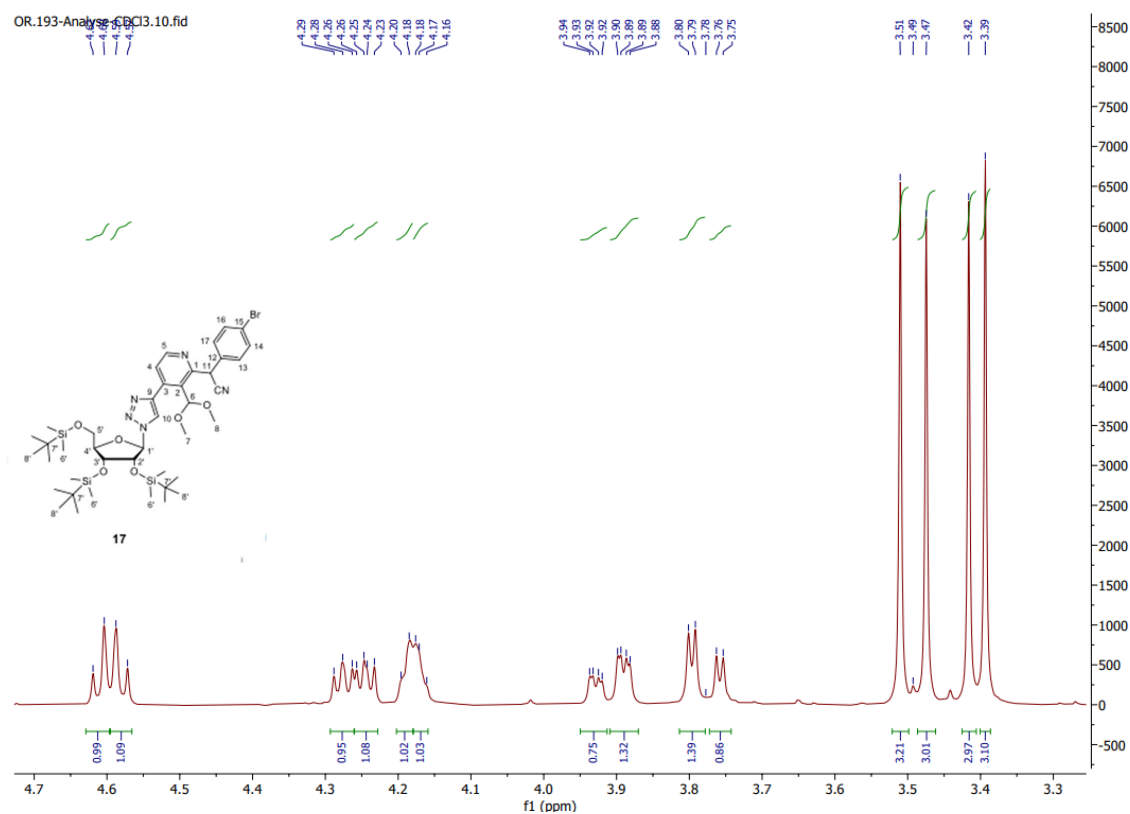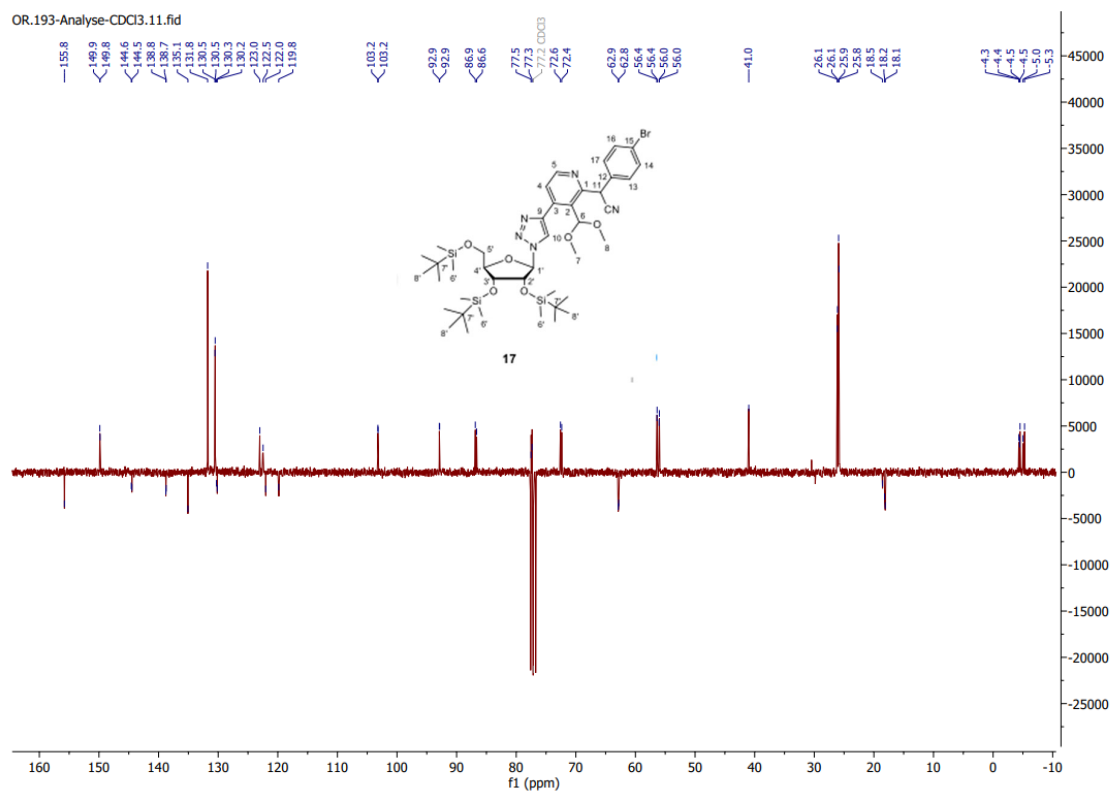

COSY spectrum of molecule **17** at 400 MHz

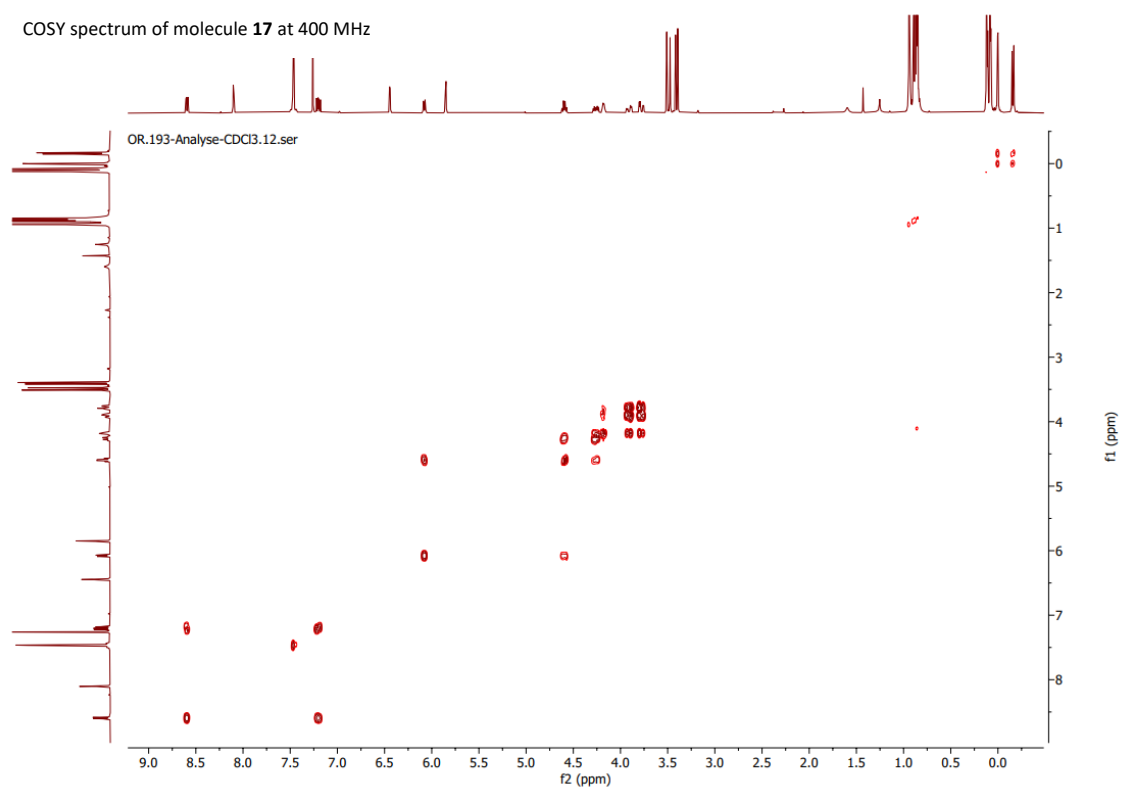

HSQC spectrum of molecule **17** at 400 MHz

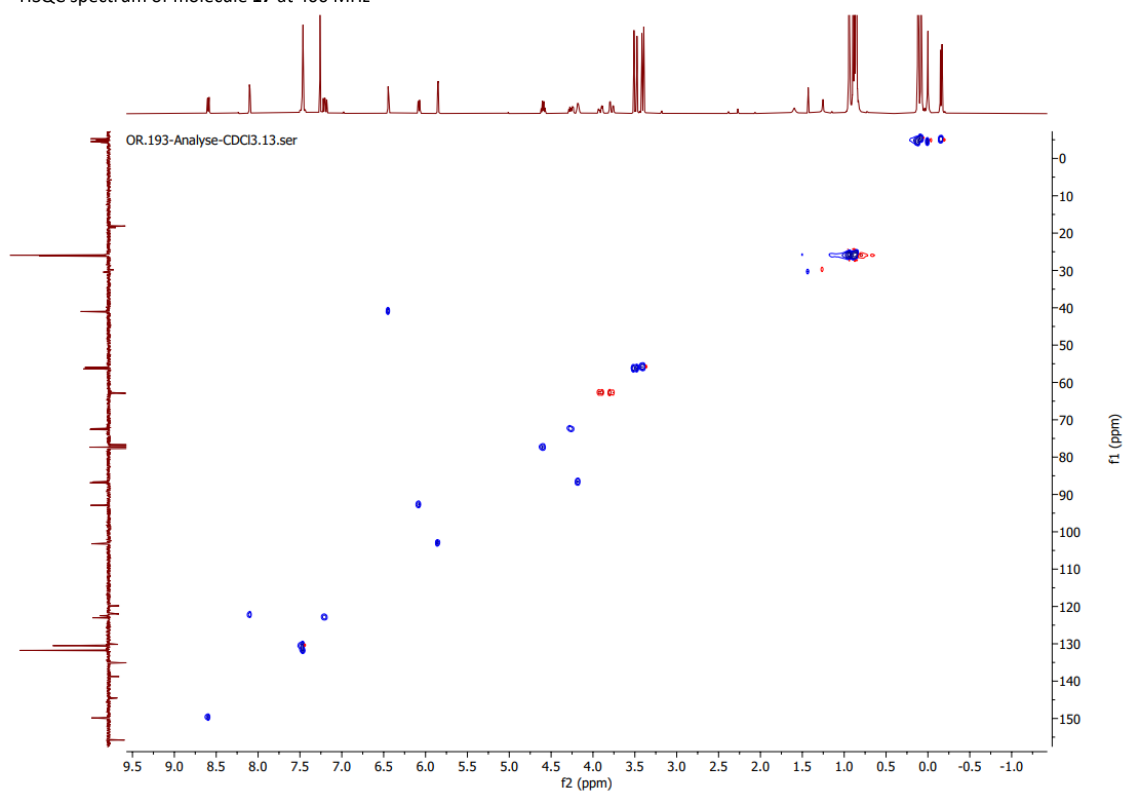



HMBC spectrum of molecule **17** at 400 MHz

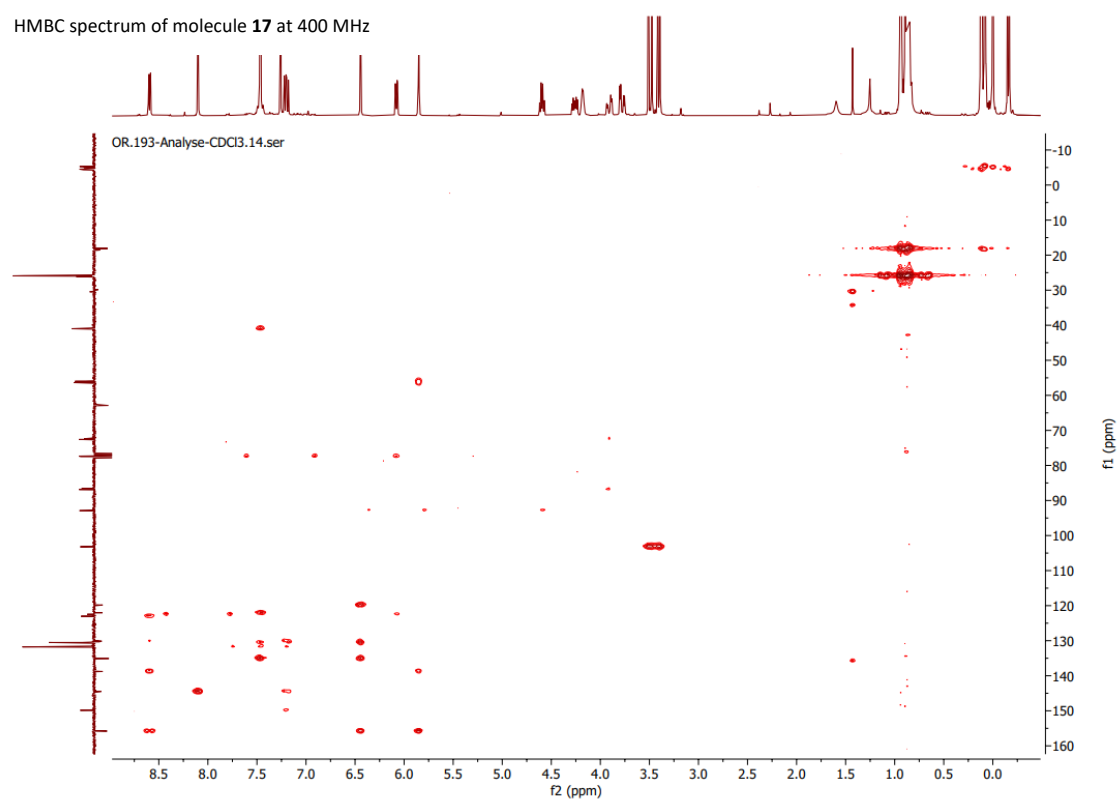

OR.181-Analyse4-MeOD.10.fid

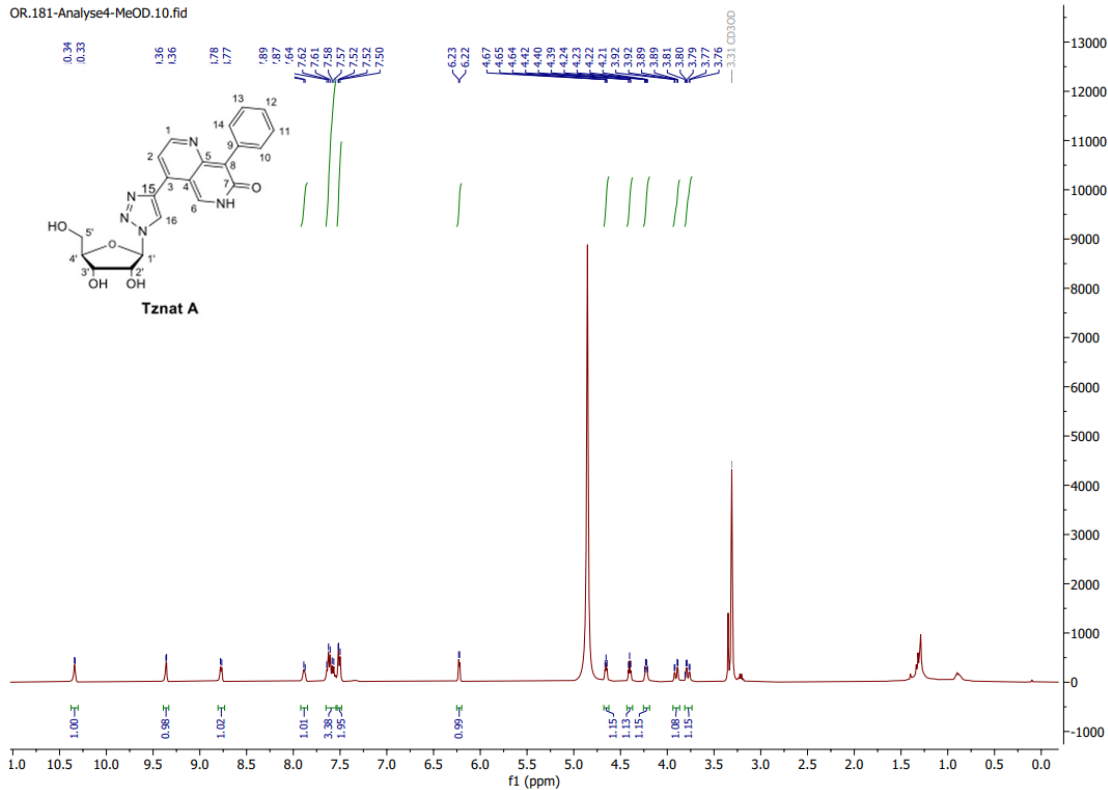

OR.181-Analyse-DMSO.11.fid

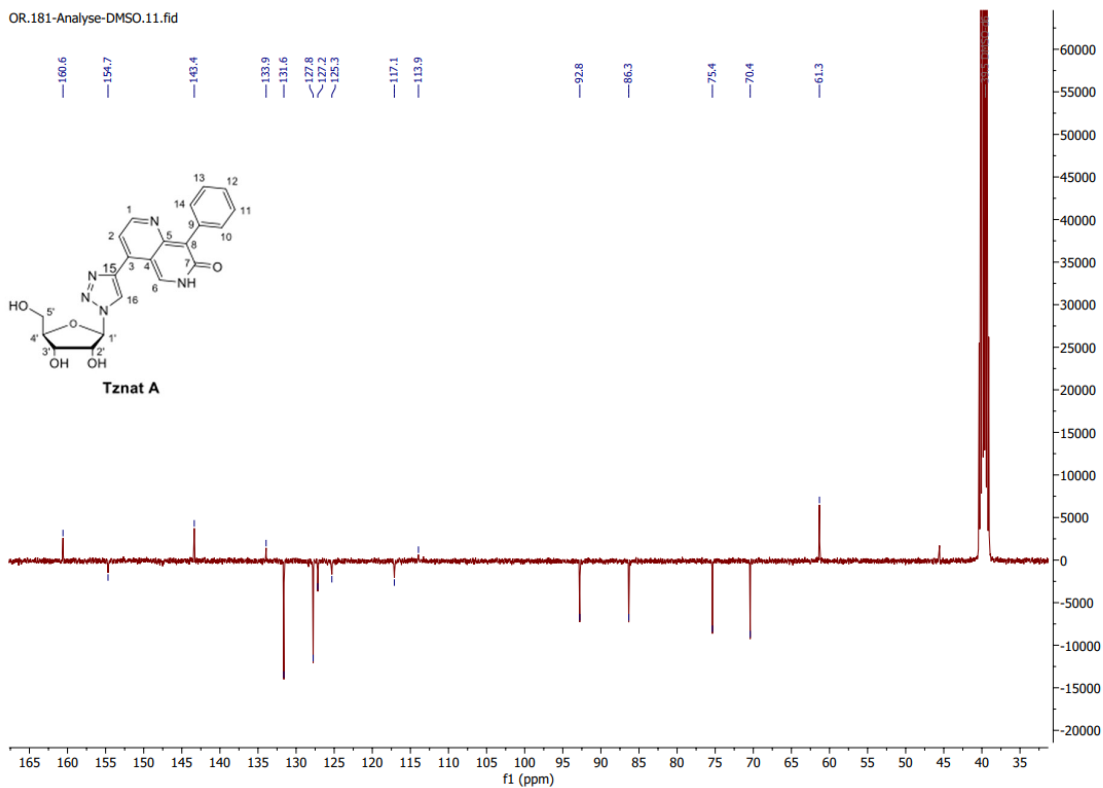

COSY spectrum of **Tznat A** at 400 MHz

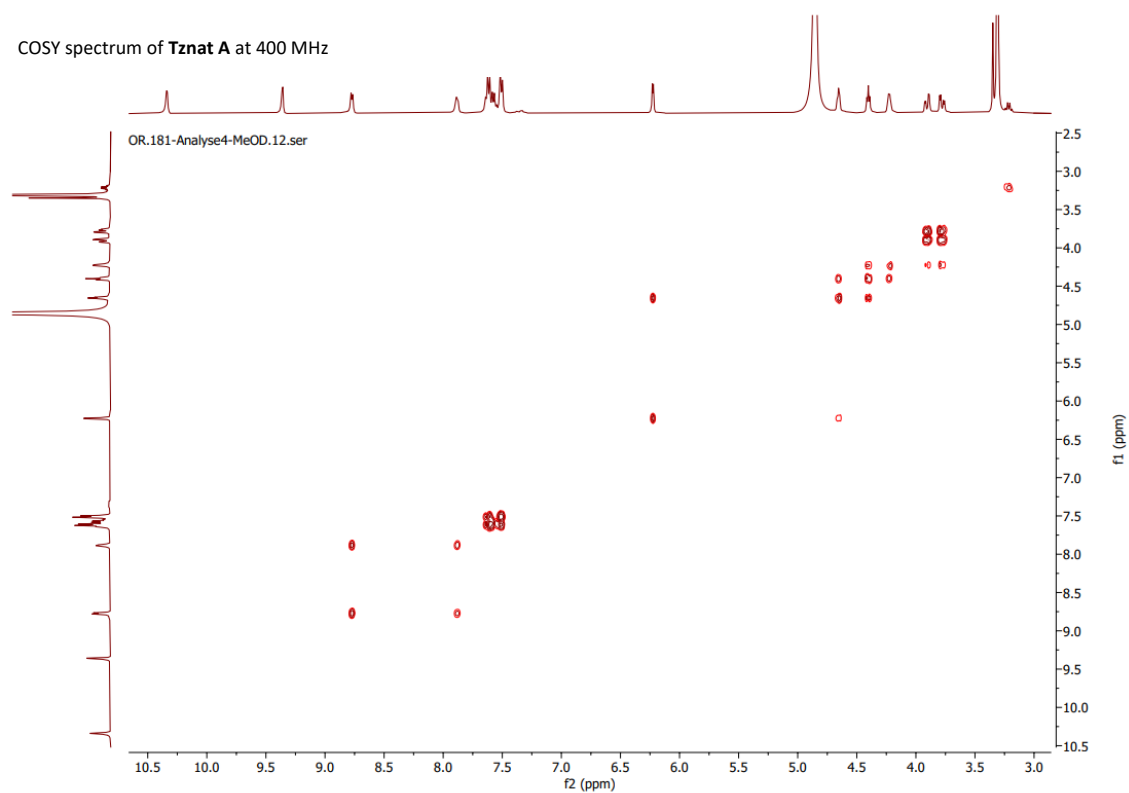

HSQC spectrum of **Tznat A** at 400 MHz

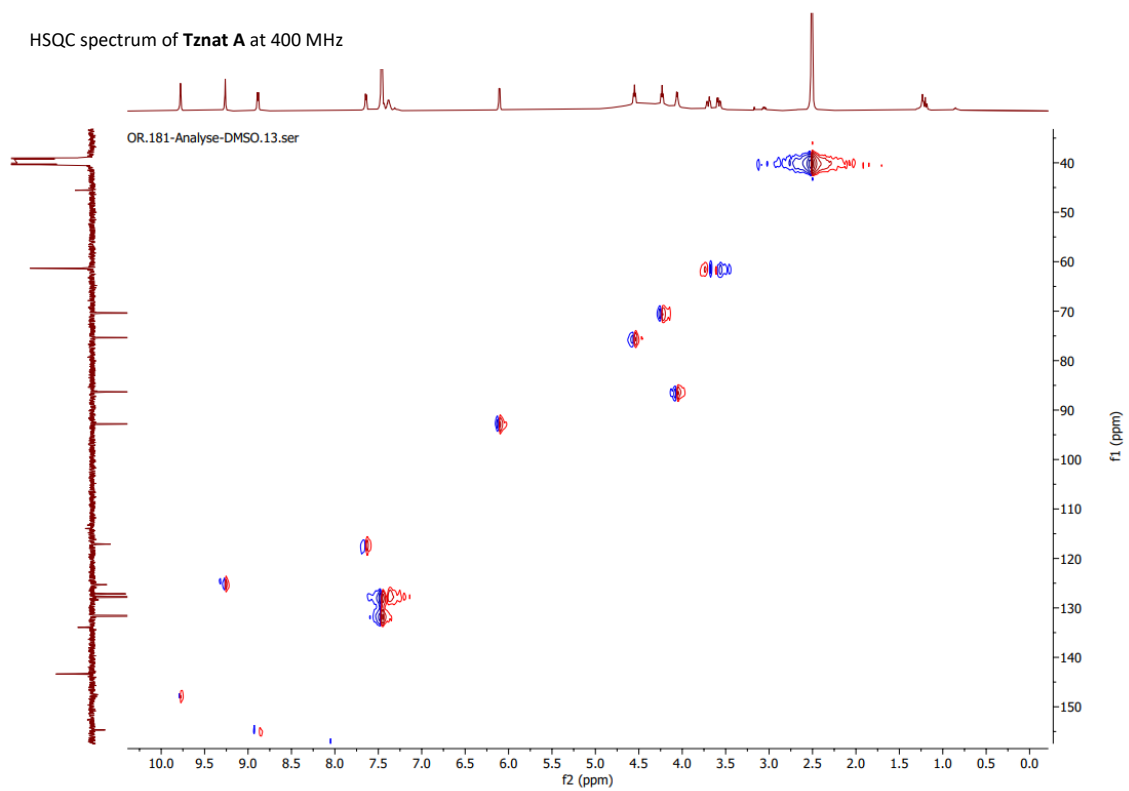

HMBC spectrum of **Tznat A** at 400 MHz

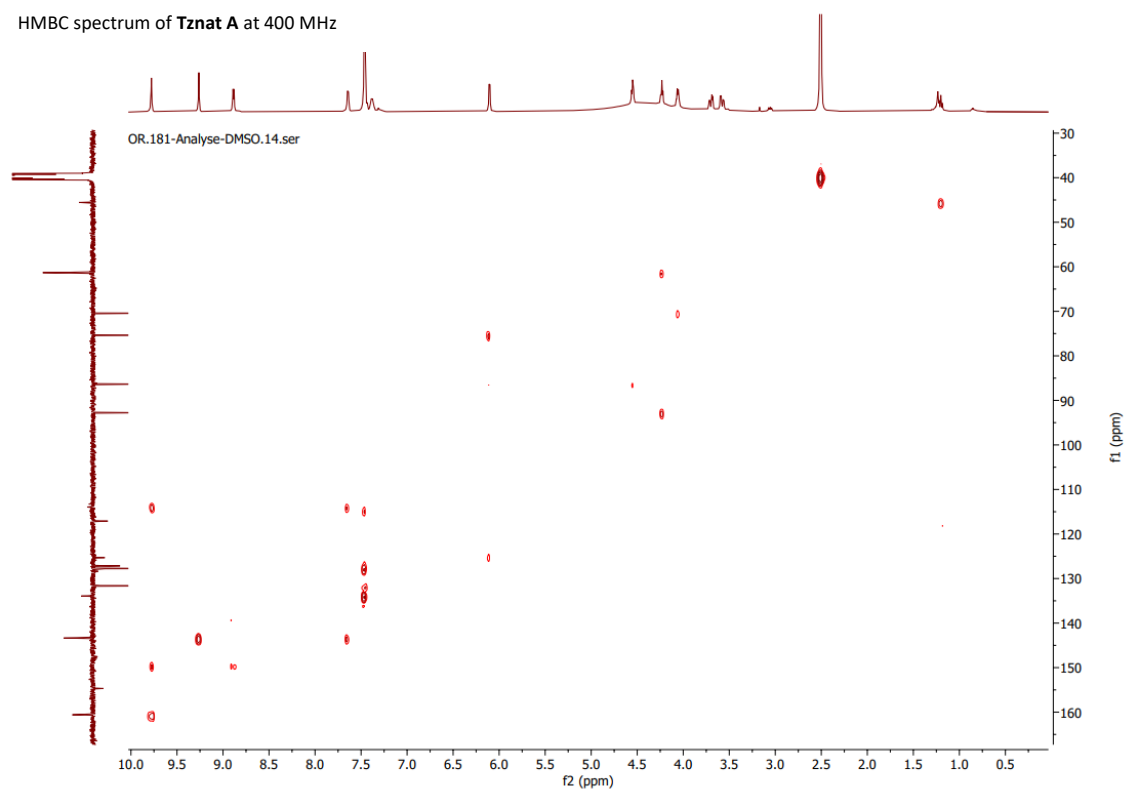

OR.194-Analyse-MeOD.10.fid

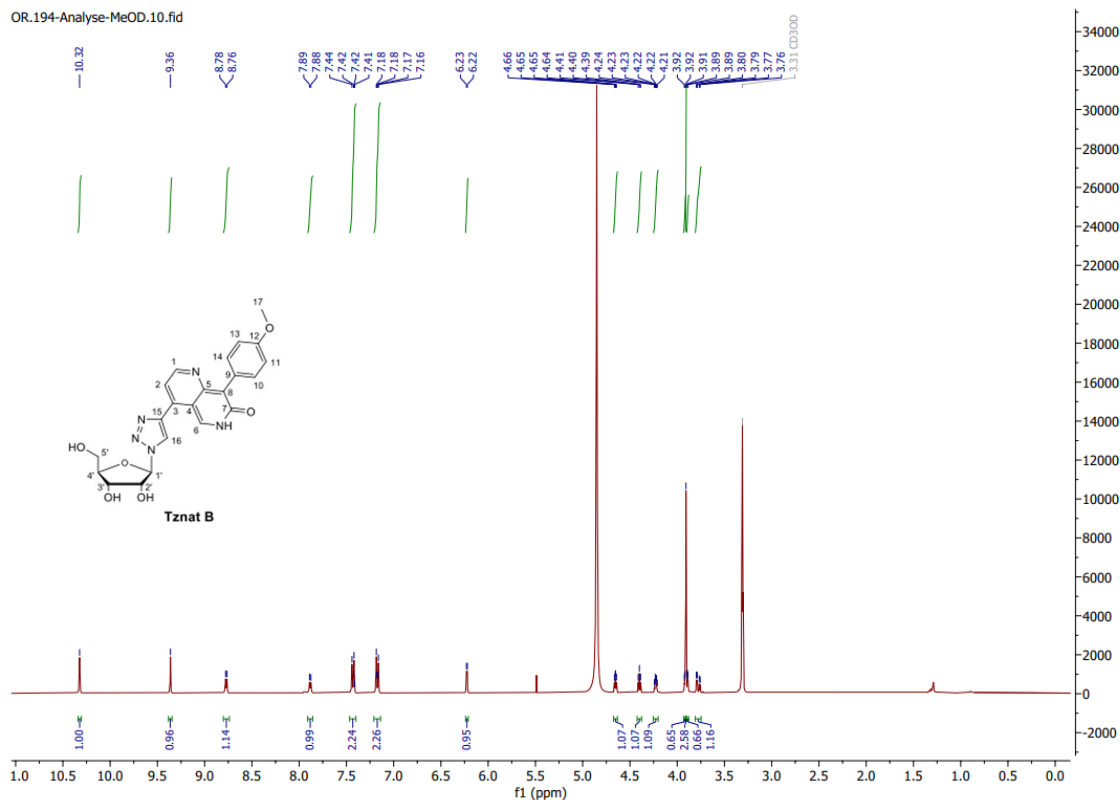

OR.194-Analyse-DMSO.11.fid

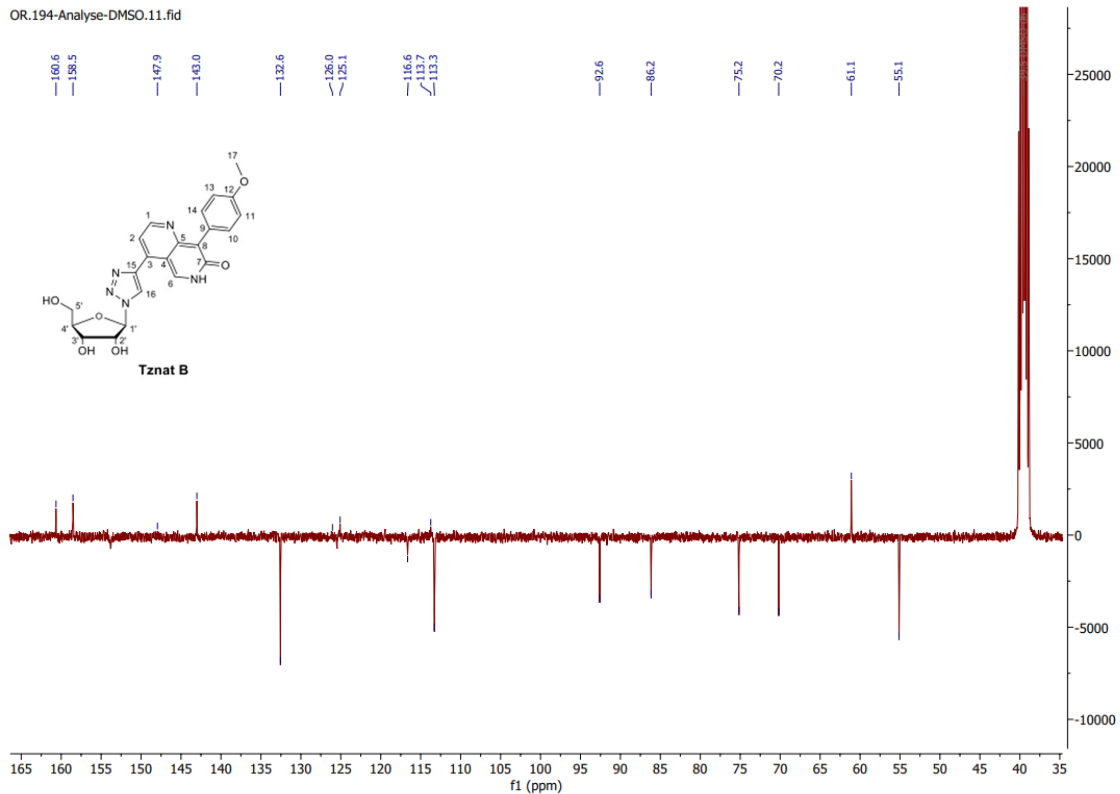

COSY spectrum of **Tznat B** at 400 MHz

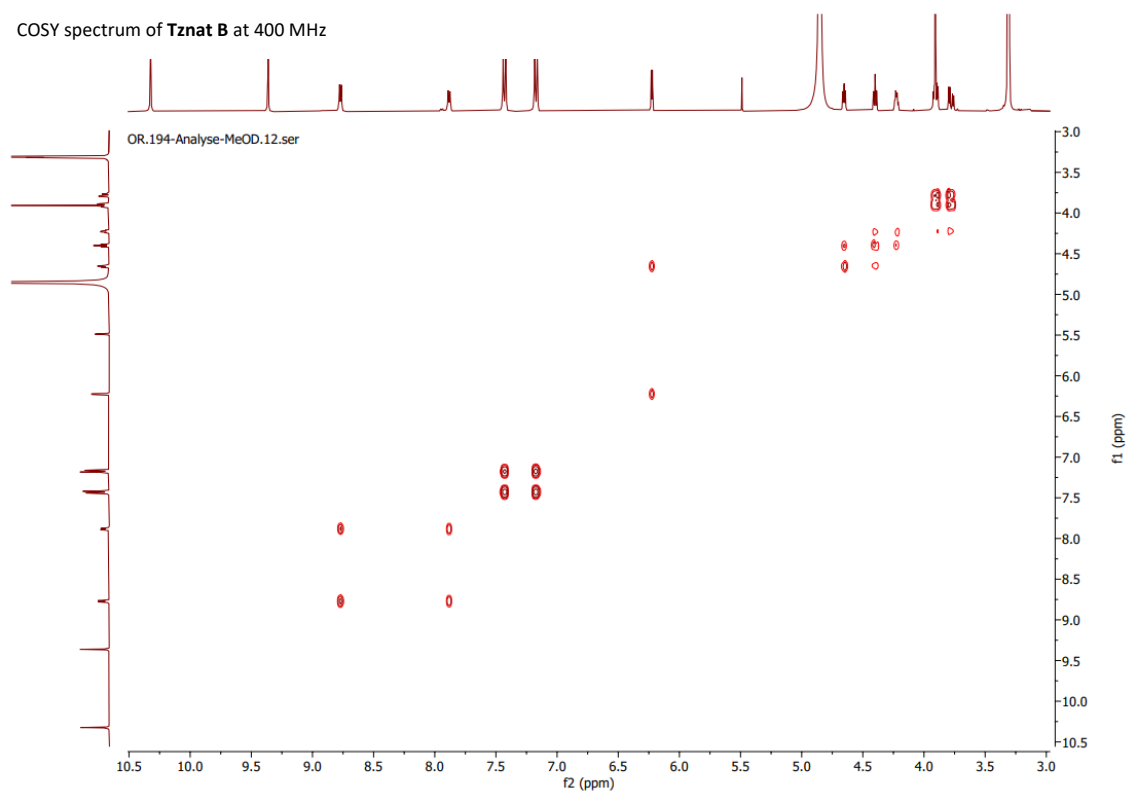

HSQC spectrum of **Tznat B** at 400 MHz

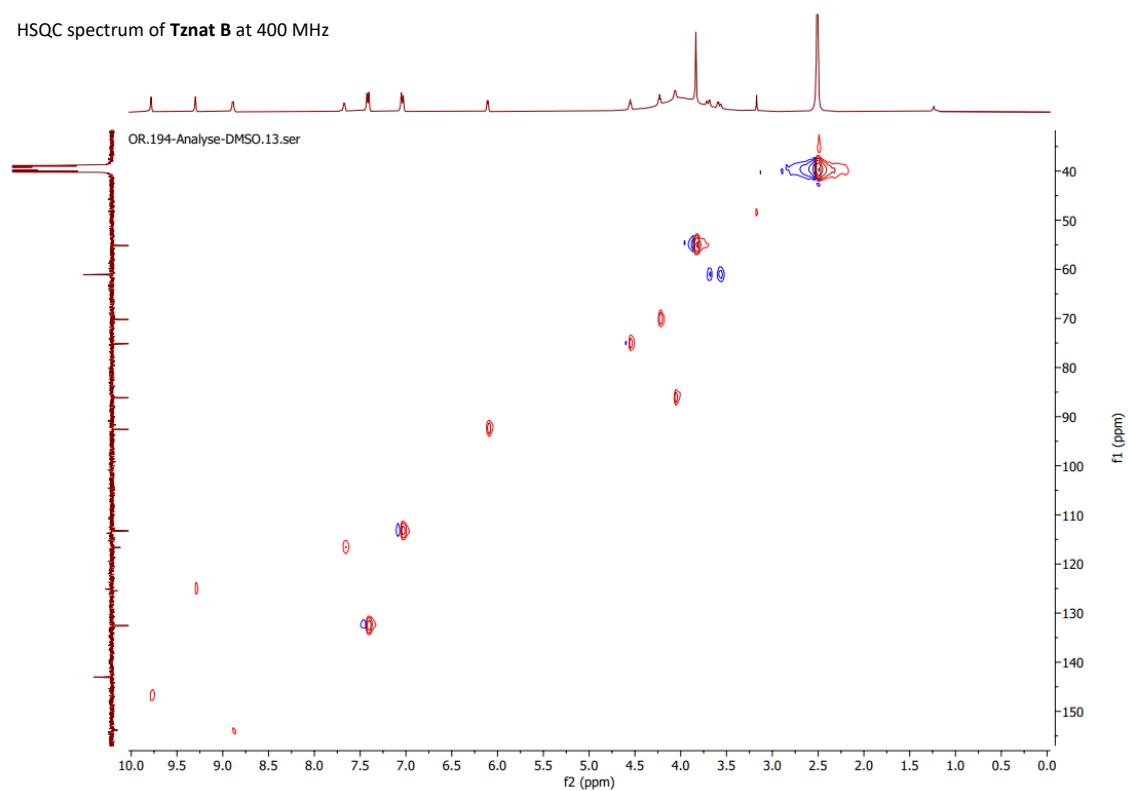

HMBC spectrum of **Tznat B** at 400 MHz

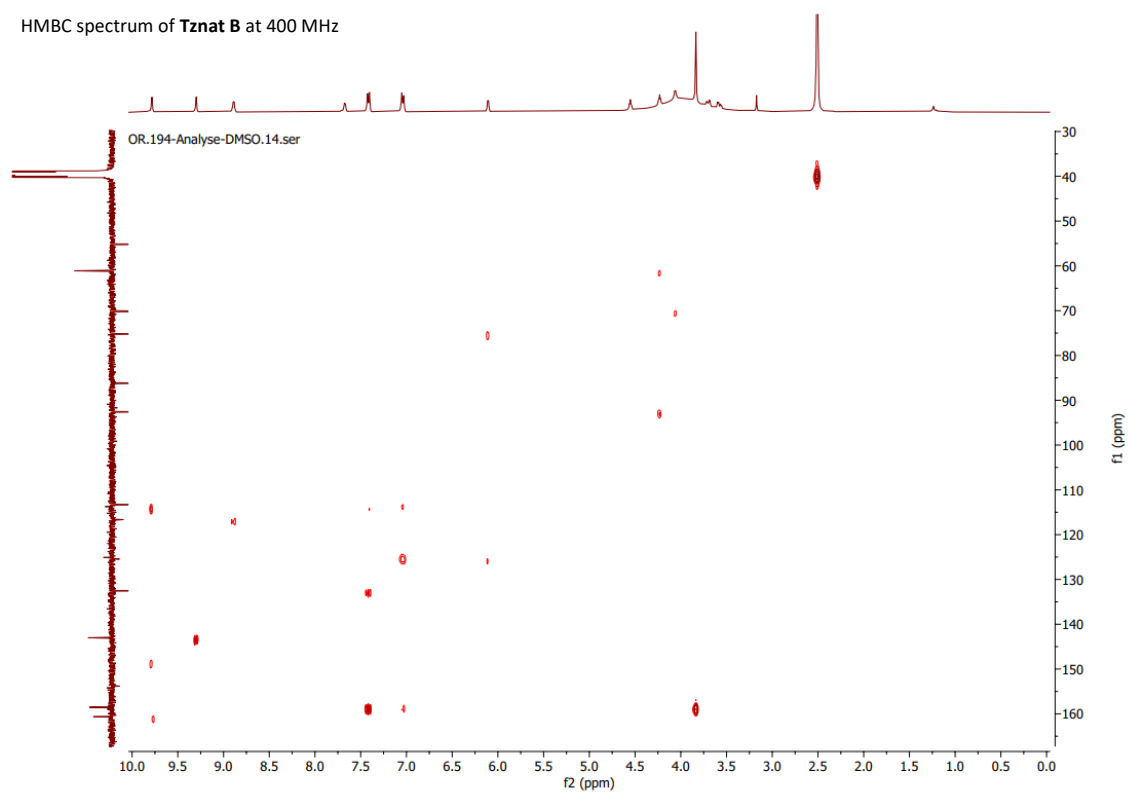

OR.195-Analyse-MeOD.10.fid

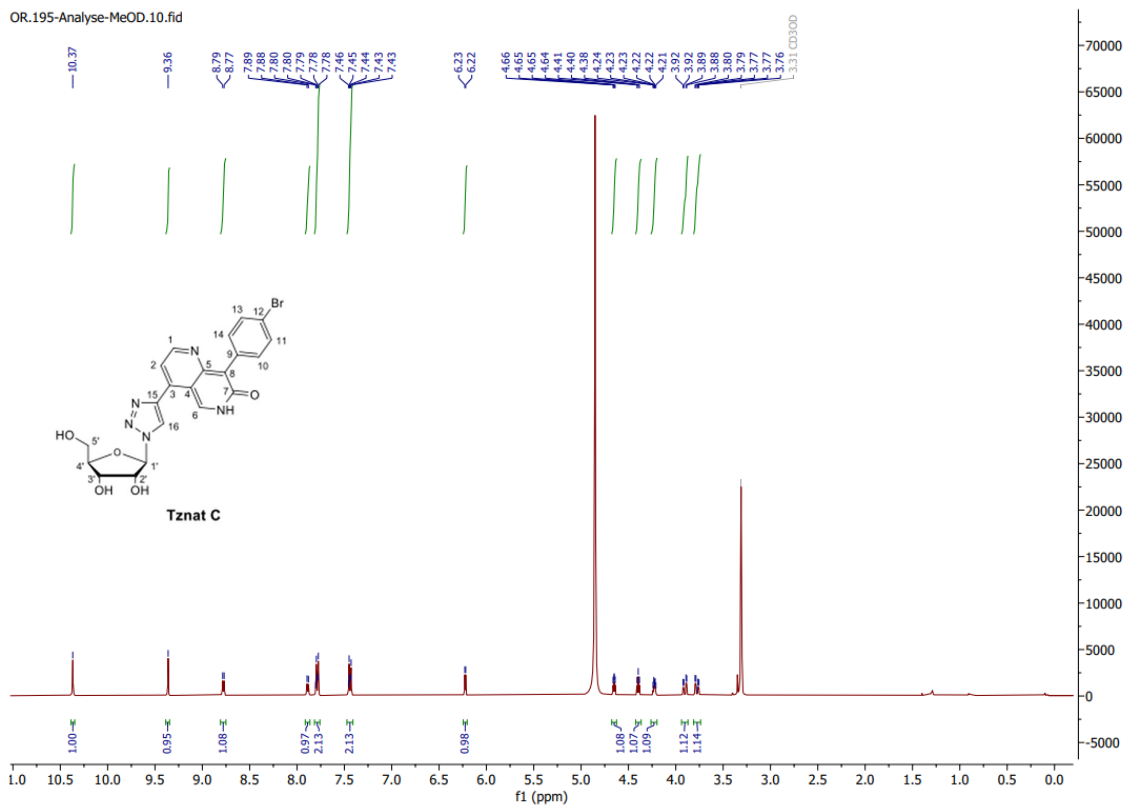

OR.195-Analyse-DMSO.11.fid

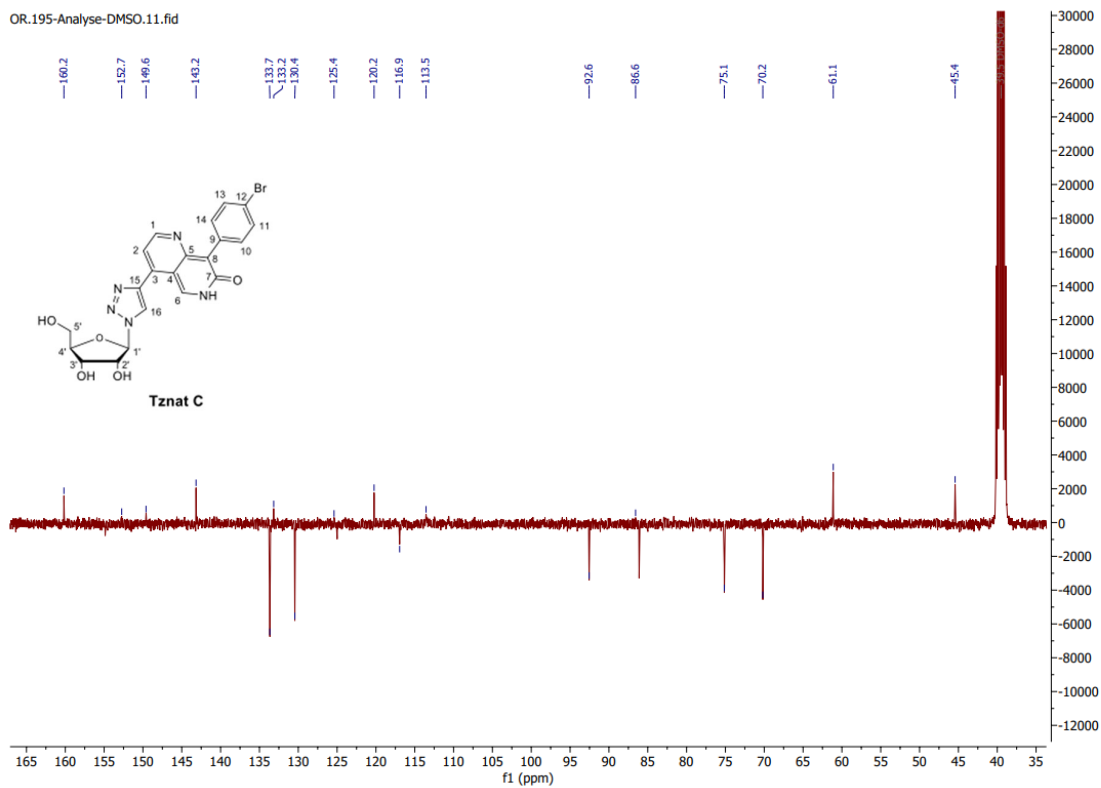



COSY spectrum of **Tznat C** at 400 MHz

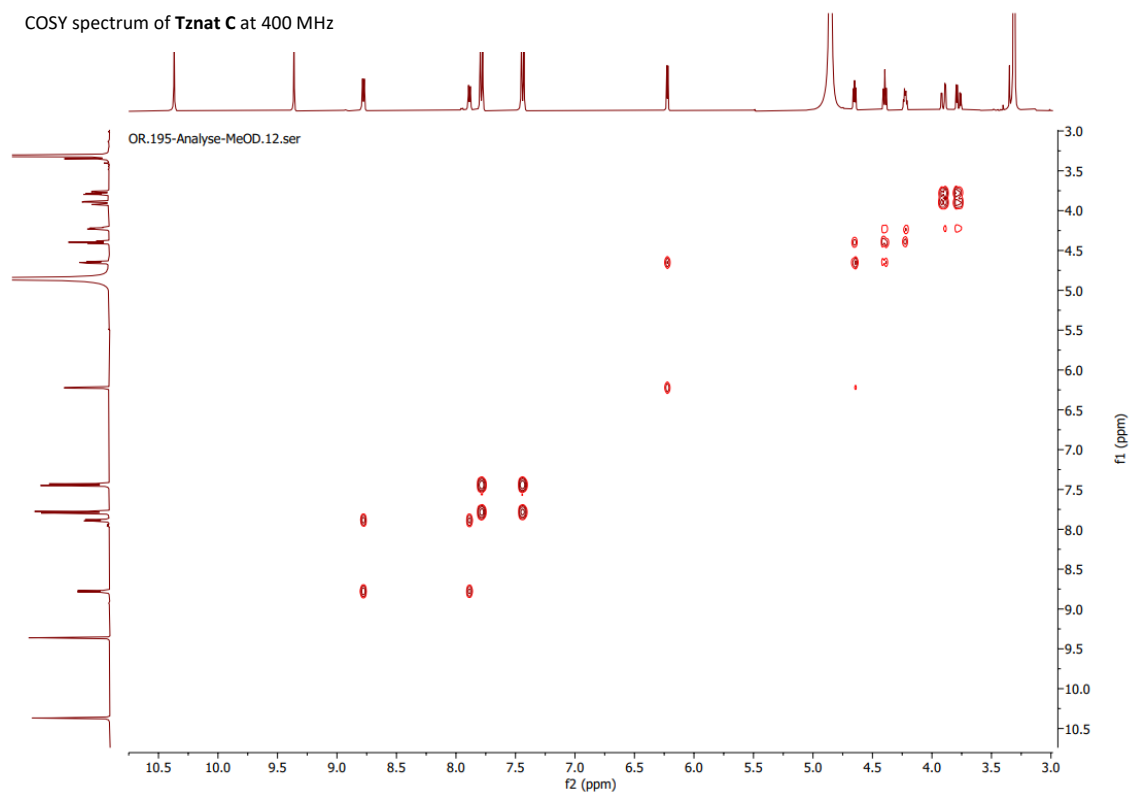

HSQC spectrum of **Tznat C** at 400 MHz

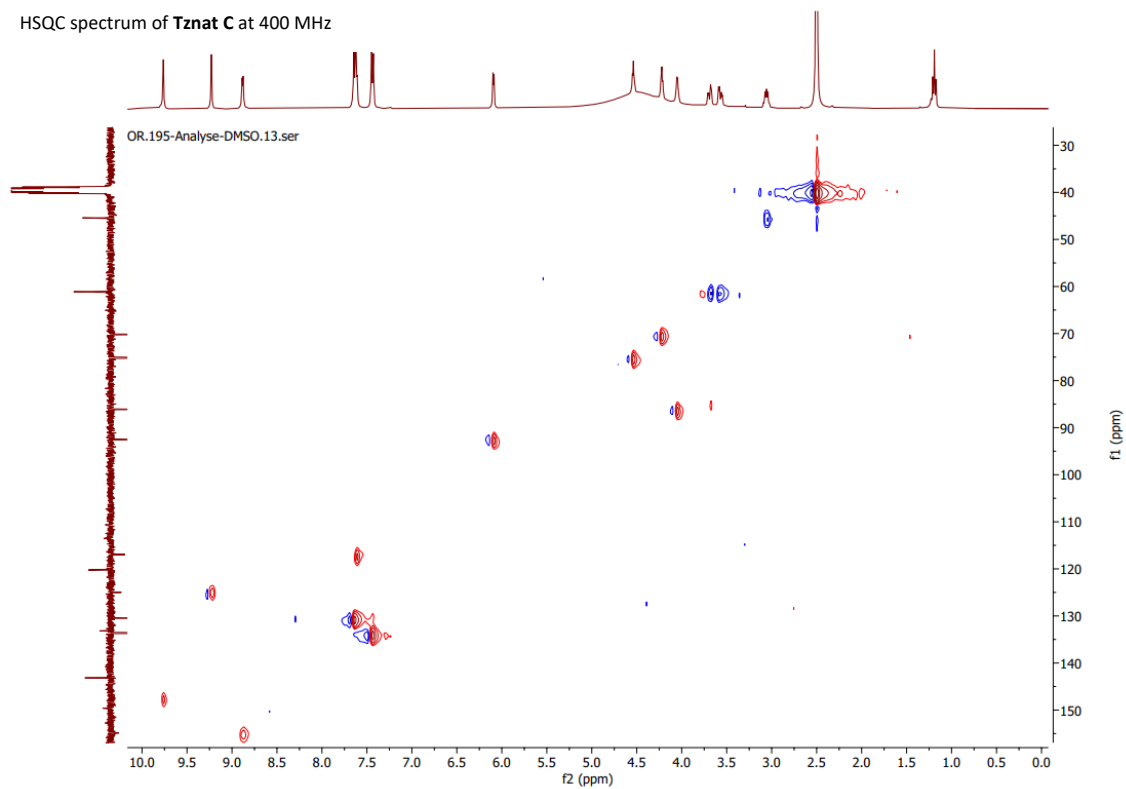

HMBC spectrum of **Tznat C** at 400 MHz

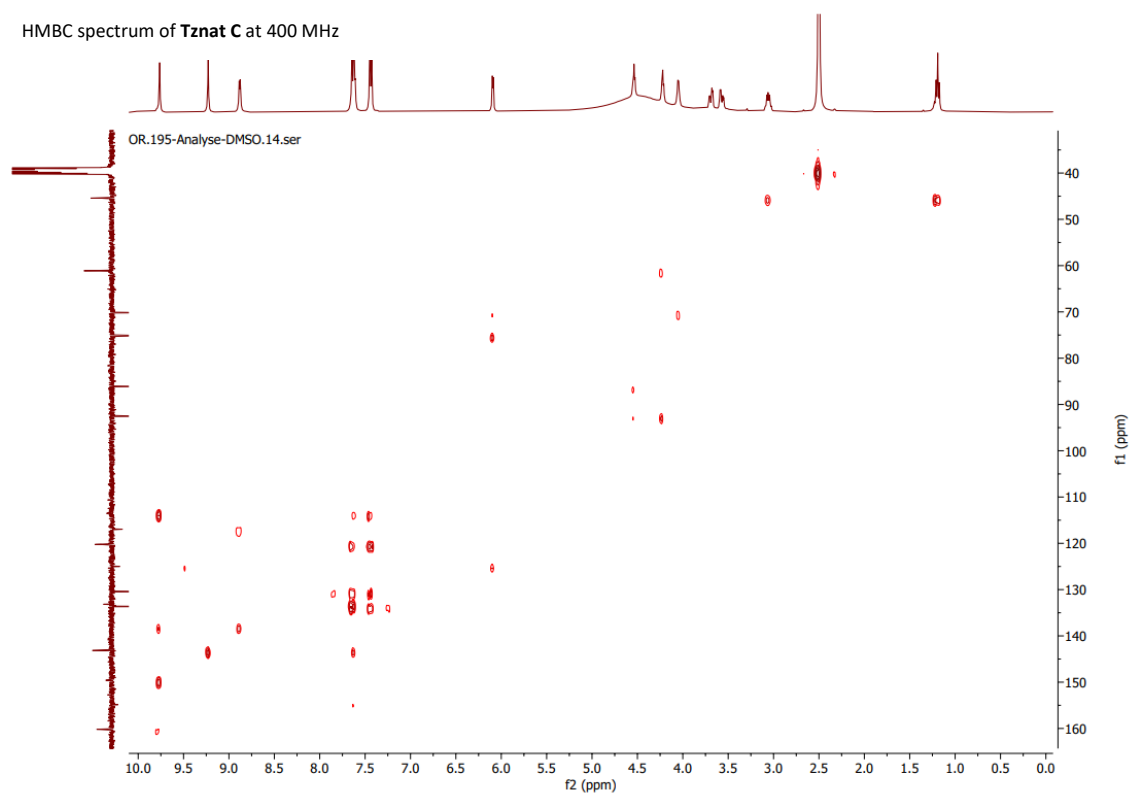

Supplement: s1 [file s1]
